1

2 **Variation in *Melitaea cinxia* gut microbiota is phylogenetically highly structured but**  
3 **only mildly driven by host plant microbiota, sex or parasitism.**

4 Minard G.<sup>1,2†</sup>, Tikhonov G<sup>1†</sup>, Ovaskainen O.<sup>1,3</sup>, Saastamoinen M.<sup>1</sup>

5

6 <sup>1</sup>Organismal and Evolutionary Biology Research Programme, University of Helsinki,  
7 Helsinki, Finland.

8 <sup>2</sup>Université de Lyon, Lyon, France ; Ecologie microbienne, UMR CNRS 5557, UMR INRA  
9 1418, VetAgro Sup, Université Lyon 1, Villeurbanne, France

10 <sup>3</sup>Centre for Biodiversity Dynamics, Department of Biology, Norwegian University of  
11 Science and Technology. N-7491 Trondheim, Norway.

12

13 †The authors contributed equally

14

15 **Running title:** *Microbiota assembly in a specialist herbivore*

16

17

18

19 **Correspondence:** Guillaume Minard, Laboratoire d'Ecologie Microbienne, Université Lyon  
20 1, 10 rue Raphael Dubois, 69100 Villeurbanne, [guillaume.minard@univ-lyon1.fr](mailto:guillaume.minard@univ-lyon1.fr),  
21 +33.472.431.143.

22

23

## 24 **Originality-Significance Statement**

25 The factors contributing to the assembly of microbiota in animals are extremely complex,  
26 and thus a comprehensive understanding of the mechanisms shaping host-associated  
27 microbial communities in natural ecosystems requires extensive ecological studies and  
28 appropriate statistical methods. In this study, we investigated the bacterial microbiota  
29 associated with the caterpillars of the Glanville fritillary (*Melitaea cinxia*), which is a long-  
30 term-studied ecological model system. We assessed the structure of variation in both  
31 occurrence and abundance of gut microbial communities of individuals collected in the wild  
32 with joint-species modelling, with the aim to relate the microbial community structure with  
33 multiple potentially impacting covariates: host plant microbiota and metabolites, hosts' sex,  
34 potential parasitoid infection, and family structure. These covariates exhibited substantial  
35 correlation with multiple microbial taxa's occurrences, which correlations were consistent  
36 for phylogenetically related groups of taxa, but varied across the whole microbial  
37 community; on the contrary, only few correlations were found with taxa's abundances. The  
38 dominating co-occurrence pattern of microbiota assembly, which effectively split caterpillar  
39 individuals into two distinct groups, was, however, unrelated to any of the considered  
40 covariates.

41

## 42 **Summary**

43 Understanding of what ecological factors shape intraspecific variation of insect microbiota  
44 is still relatively poor. In Lepidopteran caterpillars, microbiota is assumed to be mainly  
45 composed of transient bacterial symbionts acquired from the host plant. We sampled  
46 Glanville fritillary (*Melitaea cinxia*) caterpillars from natural populations to describe the  
47 microbiome and to identify potential factors that determine the structure of the microbial  
48 community, including the sex of the host, the impact of parasitoid infection, and the possible  
49 link between host plant and caterpillar microbiota. Our results demonstrate high variability  
50 of microbiota composition even among caterpillars that shared the same host plant  
51 individual. The observed variation in microbiota composition is partially attributed to the  
52 measured properties of the host or its plant microbial and chemical composition, and is  
53 aligned with microbial phylogenetic structure, with related taxa exhibiting similar patterns.  
54 However, the prevailing part of the observed variation was not associated with any of the  
55 assessed characteristics, although it followed a pronounced segregation structure: in some  
56 caterpillars the microbial communities were dominated by several related  
57 Enterobacteriaceae taxa, while in others these taxa were absent. Our results challenge  
58 previous findings that the host plant properties are the major drivers of microbiota  
59 communities of insect herbivores.

60

61

62 **Keywords:** Microbiome, metabolome, insect, arthropod, microbial ecology, community  
63 modeling, joint species distribution model

64

## 65 **Introduction**

66 All animals interact with microorganisms (McFall-Ngai *et al.*, 2013), with interactions  
67 between hosts and their microbes ranging from mutualistic to competitive (Douglas, 2010).  
68 Insects harbor highly diversified host-symbiont interactions with various examples of fitness  
69 benefits (Douglas, 2011), such as the control of the host's reproduction (Werren *et al.*, 2008;  
70 Engelstädter and Hurst, 2009), the enhancement of nutrition via effects on the digestion  
71 process (Warnecke *et al.*, 2007), the degrading of toxic metabolites (Kikuchi *et al.*, 2012;  
72 Ceja-Navarro *et al.*, 2015), and the production of nutrients essential for the host (Akman  
73 Gunduz and Douglas, 2009; Salem *et al.*, 2014). Endosymbionts can also protect their hosts  
74 against abiotic stressors and pathogens (Montllor *et al.*, 2002; Dunbar *et al.*, 2007; King *et*  
75 *al.*, 2016). The literature may, however, be biased towards mutualistic and  
76 parasitic/pathogenic interactions, whereas commensal or neutral interactions may be  
77 understudied or underreported. In general, the microbiota is a multilayer system in which  
78 prevalent members compose the core microbiota and a more flexible pool of microbial  
79 members compose the non-core community (Shapira, 2016).

80 Host-microbiota interactions are often complex, involve multiple taxa and multiple  
81 transmission processes, and consequently laboratory-based studies may fail to realistically  
82 portray natural systems. Indeed, several studies have highlighted pronounced differences  
83 in the microbiota of laboratory-reared versus field-captured individuals (Rani *et al.*, 2009;  
84 Staubach *et al.*, 2013; Tinker and Ottesen, 2016). Characterizing and determining the  
85 impact of microbiota in natural populations remains challenging, due to the multiple  
86 confounding factors that can affect the microbiota composition. Consequently, we still know  
87 little of the ecological factors that shape among-individual variation of microbial communities  
88 in natural populations. Another challenge is related to data analyses: microbiota data  
89 typically include large numbers of taxonomical units, most of which are rare, complicating  
90 the use of conventional statistical frameworks.

91 The gut microbiota of insects is often highly heterogenic both among and within species,  
92 with relatively high variation reported even across different gut sections (Douglas, 2015).  
93 The consumed diet has been suggested to be the major determinant of the microbiota  
94 composition, as it can shape the microbial communities both directly (e.g. acquisition of  
95 food-associated microorganisms or growth of microorganisms that utilize the consumed  
96 food) and indirectly (e.g. through impacts on immunity, anatomy or digestive function;  
97 Douglas, 2015). However, several studies that controlled for the transient effects of diet  
98 (e.g. in fruit flies and Asian tiger mosquitoes), still reported strong inter-individual variation  
99 in the microbiota composition (Minard *et al.*, 2015; Adair *et al.*, 2018), suggesting the  
100 importance of diet-unrelated factors. For example, gut microbiota can be acquired via  
101 maternal or horizontal transmission (Engel and Moran, 2013), influenced by host genotype  
102 or environmental conditions unrelated to food (Yun *et al.*, 2014), or they can be driven  
103 mainly by stochastic processes (Douglas, 2015; Zeng *et al.*, 2015). In Lepidoptera, there is  
104 only little evidence on the transfer of symbiotic bacteria among individuals (Paniagua Voirol  
105 *et al.*, 2018). Consistently, the Lepidopteran gut microbiome has been shown to be highly  
106 variable compared to other insect orders, with only few resident bacteria (Hammer *et al.*,  
107 2017). The impact of the gut microbiota on the life history traits of Lepidoptera has been  
108 questioned, even though the general knowledge on the bacterial associations across  
109 species is still very limited (see Paniagua Voirol *et al.*, 2018 for a review).

110

111 To improve our understanding of the potential ecological determinants influencing  
112 associations between insect hosts and their gut symbionts, we exploit here the natural  
113 metapopulation of the Glanville fritillary butterfly (*Melitaea cinxia*) in the Åland islands,  
114 Finland. With *M. cinxia* caterpillars and their *Plantago lanceolata* host plants sampled  
115 across this system at a single timepoint, our overall aim is to associate the midgut microbiota  
116 of the caterpillars with ecological variables and thus to identify potential drivers of variation  
117 that could impact these communities. In particular, we ask (1) whether there is a

118 correspondence between the host plant microbiota and that of the caterpillar microbiota; (2)  
119 whether the host plant microbiota and the caterpillar microbiota are influenced by the  
120 metabolite profile of the host plant; (3) whether the caterpillar microbial communities are  
121 structured according to the sex and parasitoid infection status of the host; (4) whether after  
122 accounting for the above mentioned factors, variation in these communities is structured  
123 according to caterpillar families or is idiosyncratic among individuals independent of the  
124 family structure; and (5) whether the variation in the microbiota with respect to the questions  
125 1-4 is phylogenetically structured. Further, to examine if and how microbial variation  
126 influences the fitness of the host, we ask (6) whether the over-winter survival of caterpillar  
127 nests can be explained by microbiota composition. To address these questions, we apply  
128 a joint species distribution model that allows us to evaluate both species- and community-  
129 level responses to the abovementioned covariates, as well as co-occurrence patterns of the  
130 microbiota both at the levels of individual caterpillars and caterpillar families.

131

## 132 **Results**

### 133 *Factors influencing caterpillar microbiota*

134 Overall, the caterpillar microbiota was composed of variable microbiota among which the  
135 dominant taxa (>1% of the relative abundance across all samples) were *Uruburella*,  
136 *Cloacibacterium*, *Moraxella*, *Acinetobacter*, *Dermacoccus*, *Hymenobacter*,  
137 *Corynebacterium*, *Paracoccus*, *Wolbachia*, *Methylobacterium*, and unclassified  
138 Actinobacteria, Enterobacteriaceae and Corynebacteriaceae (Fig. 1A, Fig. 2). *Uruburuella*  
139 was most prevalent but still detected in only 58.8% of the samples, suggesting no core  
140 microbiota across all individuals. To investigate the potential ecological factors explaining  
141 variation in the occurrences and abundances of microbial taxa, we used joint-species  
142 modelling framework.

143 Averaged over the whole community, the presence-absence part of the caterpillar model  
144 had only little predictive power through its fixed effects (Prediction P1; Supplementary Table  
145 S1). In the line with this, caterpillar sex, parasitoid infection or the host plant's bacterial or  
146 metabolic composition did not show a community-consistent correlation with the presence-  
147 absence patterns of the bacterial community ([5%, 95%] credibility interval for community-  
148 level mean value of species response overlapped with zero, Table 1). Accounting for the  
149 residual species-to-species associations substantially increased the predictive power,  
150 which however remained highly variable over the OTUs (Prediction P2; Supplementary  
151 Table S1), but was only slightly worse than the explanatory power of the full model  
152 (Prediction P3; Supplementary Table S1). These results suggest that the modelled  
153 associations among bacterial taxa (OTUs) represent a true biological signal instead of  
154 merely model overfitting artefact. In the abundance model, both the fixed effects and the  
155 species-to-species associations contributed roughly equally (Supplementary Table S1).  
156 However, similarly to the presence-absence model, none of the fixed effects had a  
157 consistent correlation with the abundance pattern, and thus the influences of the  
158 environmental covariates were taxon-specific . The variance partitioning of additive  
159 Gaussian components in HMSC's latent predictor mirrored the results of predicted power  
160 comparison (Fig. 3).

161 Despite the generally low proportion of explained variance (Fig. 3), a substantial proportion  
162 of OTUs showed positive or negative responses to the fixed effects (Fig. 4). Specifically,  
163 the occurrence probabilities of many OTUs decreased with the presence of the parasitoid  
164 infection (mostly Clostridia, Alphaproteobacteria and Betaproteobacteria), and were lower  
165 in males than in females (mostly Rhodobacteriales and Neisseriales). The presence of  
166 *Wolbachia*, on the other hand, was positively associated with the parasitoid infection of the  
167 caterpillars. Only a minority of the OTUs classified as *Hymenobacter* and *Methylobacterium*  
168 showed increased occurrence probability with the increased abundance of the focal OTU in

169 the host plant. Unlike in presence-absence model, in the abundance model only a small  
170 proportion of the individual OTUs' responses gained substantial statistical support (Fig. 4).

171 Phylogenetically related bacterial taxa were estimated to have similar responses to the  
172 covariates: the strength of the phylogenetic signal was  $0.98 \pm 0.002$  (posterior mean  $\pm$   
173 posterior standard deviation) in the presence-absence model and  $0.86 \pm 0.025$  in the  
174 abundance model. This shows that closely related bacteria had similar niches in the sense  
175 that they responded similarly to the fixed effects included in the model. This result is clearly  
176 visible in Fig. 4, that represents the responses of bacterial taxa ordered by taxonomy, and  
177 where the positive and negative effects (the red and blue colors) are presented as  
178 contiguous blocks rather than randomly distributed across the OTUs. The majority of the  
179 Betaproteobacteria, for example, have lower occurrence probability when the individual is  
180 infected by the parasitoid. The occurrence of the microbial OTUs were phylogenetically  
181 structured not only with respect to the measured covariates, but also in their residual  
182 variation, as the OTUs split into two groups in a markedly pronounced manner (Fig. 5A).

183 One of these two groups consisted, with minor exceptions, of the Enterobacteriaceae family,  
184 and the other group of the remaining taxa including *Uruburella*, *Cloacibacterium*, *Moraxella*,  
185 *Acinetobacter*, *Dermacoccus*, *Hymenobacter*, *Corynebacterium*, *Paracoccus*. Thus, some  
186 of the caterpillars were characterized by a high representation of Enterobacteriaceae in their  
187 microbiota, while the remaining individuals were characterized by a low representation of  
188 Enterobacteriaceae. Given its dominant role in variance partitioning, this pattern is the  
189 strongest signal related to OTU occurrences in our data (Fig. 5A), and its validity is  
190 supported by similar results of a complementary analysis based on Dirichlet mixture  
191 modelling (Supporting Information, Fig. S1AC). In contrast to the strong patterns recorded  
192 in the presence-absence model, only few statistically supported associations were found in  
193 the abundance model (Fig. 5B). Quite unexpectedly, the caterpillar family structure was  
194 estimated to play only a minor role on the microbial community structure, as both for the



195 presence-absence and abundance models it was attributed with minor proportion of  
196 variance (Fig. 3) and almost no statistically supported associations were found .

197 To summarize, the variation of bacterial community exhibited a complex structure, which  
198 had both inter-individual and inter-OTU patterns, and did not support a simple  
199 characterization. In terms of variation among caterpillar individuals, we found that neither  
200 the fixed effects assessed nor the family relationships were capable to explain the very  
201 strong segregation of individuals into two groups with very distinct microbial composition:  
202 about 40% of the individuals were characterized by the microbiota with a co-occurrence of  
203 phylogenetically related Enterobacteriaceae, whereas the rest of the individuals were  
204 characterized by a more complex microbial community, composed of *Uruburella*,  
205 *Cloacibacterium*, *Moraxella*, *Acinetobacter*, *Dermacoccus*, *Hymenobacter*,  
206 *Corynebacterium*, *Paracoccus*, *Wolbachia*, *Methylobacterium*, and some unclassified  
207 Actinobacteria and Corynebacteriaceae. Although, the fixed effects included in our model  
208 accounted for minor part of this variation, and the microbial OTU responses to the fixed  
209 effects were not synchronized across whole community, we found that phylogenetically  
210 similar OTUs responded to these effects in similar manner.

211

#### 212 *Factors influencing host plant foliar microbiota*

213 Contrary to the microbiota within the caterpillar gut, the plant microbiota was composed of  
214 highly prevalent bacterial taxa (detected in more than 90% of the collected samples; Fig.  
215 1B). The bacteria in this core microbiota were assigned to *Methylobacterium*,  
216 *Hymenobacter*, *Aureimonas*, *Modestobacter*, and an unclassified Microbacteriaceae.  
217 Whenever possible, we also assessed the plant metabolome by <sup>1</sup>H-NMR spectrometry (Fig.  
218 6). The identified metabolites included amino acids (Valine, Threonine, Alanine, Arginine,  
219 Glutamate, Glutamine), sugars (Xylose,  $\alpha$ -glucose,  $\beta$ -glucose, Sucrose), organic acids  
220 (Fumaric acid, acetic acid, cis-aconic acid), ethanol and defensive metabolites (Aucubin,

221 Catalpol and Verbascosides). The latter included both terpenoids (Aucubin, Catalpol) and  
222 phenolic compounds (Verbascosides), which constitute the main chemical defense of  
223 *Plantago lanceolata* against herbivores and pathogenic microorganisms. Most of the  
224 variation in the plant metabolites across samples were explained by unannotated metabolite  
225 signals with a chemical shift specific of carbohydrates and amino acid residues (PC1 in Fig.  
226 S3) other annotated metabolites including defensive metabolites showed only limited  
227 variations (PC1, PC2, PC3 in Fig. S3).

228 Similar to the OTUs in caterpillars, we applied joint species modelling to assess the  
229 presence-absence and the abundance patterns of the bacterial taxa retrieved from the host  
230 plant leaves. The plant model showed lower predictive power than caterpillar model,  
231 suggesting that the variation in microbial communities was less predictable at plant foliar  
232 than in caterpillar guts (Supplementary Table S1). Of the explained variation, the metabolite  
233 composition of the plants was the key determinant in both the presence-absence and the  
234 abundance models (Table 1, Supplementary Table S1, Supplementary Fig. S4). Here as  
235 well, we found a strong phylogenetic structure in explaining how the OTUs responded to  
236 fixed effects: the strength of the phylogenetic signal was  $0.97 \pm 0.01$  for presence-absence  
237 model and  $0.51 \pm 0.08$  for the abundance model (see Supplementary material,  
238 Supplementary Fig. S5, S6). This means that phylogenetically related bacteria responded  
239 in a similar manner to the variation in the plant metabolite composition. In particular, lower  
240 residues of carbohydrates and amino acids (PC1 in Fig. S3) were negatively associated  
241 with Alphaproteobacteria and Actinobacteria (PC1 of the presence absence model in Fig.  
242 S7). Contrary to the microbial communities in the caterpillar, unexplained associations  
243 between bacteria OTUs were much weaker. The Dirichlet-multinomial modelling results for  
244 plant-inhabiting communities indicated that this variation is best explained by a single-  
245 component distribution (Supporting Information, Fig. S1B).

246

247 *Influence of microbiota on overwinter survival*

248 As the caterpillars of the Glanville fritillary overwinter gregariously, mainly in family groups,  
249 we were interested in testing whether the microbiota composition of the samples collected  
250 from the field would correlate with the survival of the siblings remaining in the wild. This  
251 would have demonstrated an important fitness benefit of the microbiota composition in wild  
252 populations. However, we did not find the over-wintering mortality of families to be related  
253 to the microbiota composition or the metabolite profile of the host plants in which the  
254 caterpillars were residing on (see Supplementary Information).

255

256 **Discussion**

257 Symbionts that are highly competitive, strongly adapted to their host, and frequently  
258 colonize host populations form the core microbiota shared among individuals of the same  
259 species (Shapira, 2016). On the contrary, symbionts that are competitively inferior, less  
260 adapted to the intestinal conditions (e.g. pH, and digestive enzymes), and/or are rarely  
261 acquired or transmitted among individuals, tend to form a pool of transient bacteria that  
262 consequently are subject to higher fluctuations among hosts (Shapira, 2016; Macke *et al.*,  
263 2017). We show that the natural midgut microbial community of *M. cinxia* caterpillar is highly  
264 variable, and that only a minor proportion of that variation is related to the measured  
265 caterpillar's traits or the properties of the host plant in which it was feeding. In contrast, we  
266 documented a strong co-occurrence patterns of OTUs at the level of caterpillar individual,  
267 which could not be attributed to any of the covariates included in our analyses. These co-  
268 occurrence patterns in the microbiota were strongly phylogenetically structured, suggesting  
269 two mutually exclusive groups of bacterial communities. One of these groups consisted of  
270 mainly Enterobacteriaceae, whereas the other group consisted of the remaining taxa.  
271 Enterobacteriaceae contains several taxa specifically associated with animal digestive  
272 system with a broad range of host-microbe interactions ranging from pathogenic to

273 mutualistic (Douglas, 1998; Weiss *et al.*, 2006; Chandler *et al.*, 2011; Parmentier *et al.*,  
274 2016). Enterobacteriaceae are one of the most widespread bacteria also known to be  
275 associated with Lepidoptera (Paniagua Voirol *et al.*, 2018), and in *Heliconius erato*, for  
276 example, they dominate the gut microbiota already in the early developmental stages  
277 (Hammer *et al.*, 2014). Consistent with our results, the microbiota of *Drosophila*  
278 *melanogaster* has also been shown to be phylogenetically structured (Adair *et al.*, 2018). In  
279 general, Lepidopteran associated microbiota are suggested to be highly variable  
280 (Staudacher *et al.*, 2016): a study on caterpillars representing 124 Lepidopteran species  
281 showed high inter- and intraspecific variation in the gut microbiota, with a poorly abundant  
282 core microbiota (Hammer *et al.*, 2017). The dominance of co-occurring taxa, such as  
283 Enterobacteriaceae in our study, may be driven by several factors, such as priority effects  
284 (dominance of a group of microbes that were the first to colonize the gut), the specific  
285 association of bacteria involved in mutualistic interactions, or by a niche overlap among the  
286 co-occurring bacteria that grow under similar conditions (Kennedy and Bruns, 2005; Peay  
287 *et al.*, 2012; Sprockett *et al.*, 2018). Due to the limitation in the biological material, we could  
288 not quantify absolute abundance with e.g. qPCR. As our results are based on relative  
289 abundances, we cannot exclude the possibility that e.g. the individuals have otherwise a  
290 uniform microbiota but some individuals are additionally massively colonized by  
291 Enterobacteriaceae.

292

293 *Sex and parasitoid infection are correlated with variation of marginal bacterial taxa*

294 The occurrence of OTUs within Rhodobacterales and Neisseriales orders was generally  
295 higher in female than male caterpillars. Due to the absence of sexual dimorphism and  
296 proper genetic markers, most studies conducted on immature developmental stages of  
297 insects fail to consider sex differences in the microbiome. However, sex-specific differences  
298 may greatly impact the microbiota from early caterpillar instar onwards. In the silkworm,

299 where sexes can be identified in the caterpillars (Zhang *et al.*, 2010), no strong difference  
300 was evident in the global  $\beta$ -diversity structure of the bacterial microbiota. However,  
301 marginal differences in the relative abundances of some bacterial taxa was reported, as  
302 females were shown to preferentially harbor *Delftia*, *Aurantimonas* and *Staphylococcus*  
303 while males were mostly colonized by *Enterococcus* (Sun *et al.*, 2016). In adult *H. erato*,  
304 males and females share similar microbial communities (Hammer *et al.*, 2014), whereas in  
305 *Spodoptera littoralis* the sexes harbor divergent bacterial communities, with higher  
306 Enterobacteriaceae proportion found in females (Chen *et al.*, 2016). It is noteworthy that  
307 even when found, the consequences of sex-dimorphic microbiota in Lepidoptera are not  
308 well understood. Chen *et al.* (2016) showed enrichment of bacteria carrying genes involved  
309 in the energetic metabolism in females. Some of these bacterial taxa colonizing females  
310 were partly retrieved from the eggs. Those bacteria may be vertically transmitted from the  
311 mother to their eggs.

312 We found that the parasitoid infection was also associated with lower occurrence probability  
313 of some taxonomical groups, such as Clostridia, Rhizobiales, Neisseriales and  
314 Burkholderiales. This may result from parasitoid infection modifying host's immune (Tan *et al.*  
315 *et al.*, 2018) or metabolic (Potter and Woods, 2012; Mrinalini *et al.*, 2015) homeostasis that  
316 can further influence the intestinal microbial community. Several studies have recently  
317 reported an impact of polydnviruses injected in the caterpillars through the venoms of  
318 parasitoid wasps (Cusumano *et al.*, 2018; Tan *et al.*, 2018; Zhu *et al.*, 2018). These  
319 symbiotic viruses induce changes in the caterpillar-plant interactions as well as in host  
320 immunity. Even though it has never been specifically studied, these viruses might also  
321 directly or indirectly impact the microbiota of the caterpillar. Alternatively, individuals not  
322 carrying specific symbionts may be more attractive or susceptible to the parasitoid infection.  
323 Such processes have been described, for example, in aphids where facultative symbionts  
324 interfere with the volatile signals released by the plant to attract parasitoid (Frago *et al.*,  
325 2017). *Wolbachia* sp., on the contrary, were more likely to occur in the gut of parasitized

326 individuals. Previous screening of *M. cinxia* adults have not found presence of *Wolbachia*,  
327 whereas the parasitoid, *H. horticola*, is naturally infected by a *Wolbachia* strain wHho, with  
328 an infection rate of approximately 50% in the study population the Åland islands (Duplouy  
329 *et al.*, 2015). Therefore, our results suggest that *Wolbachia* may be horizontally transferred  
330 by the parasitoid. However, due to the high mortality of individuals to the parasitoid infection  
331 it may be extremely rare to find *Wolbachia* infected adults. Furthermore, we do not know  
332 whether *Wolbachia* is able to persist in the individuals across the development or if they are  
333 viable within the caterpillar gut. As recently reported only 16.3% of the Lepidopteran  
334 caterpillars are infected by *Wolbachia* with different impacts of the endosymbiotic bacteria  
335 on the reproduction and the sex ratio of their host e.g. male killing, feminization, and  
336 cytoplasmic incompatibility (Duplouy and Hornett, 2018).

337

### 338 *Effects of host plant's microbiota and metabolite composition*

339 The microbiome of plant phyllosphere is partially conserved across species with presence  
340 of recurrent taxa such as *Methylobacterium*, *Pseudomonas* and *Sphingobium* (Delmotte *et*  
341 *al.*, 2009). However, the plant microbiome is also generally considered highly variable and  
342 subject to spatial and temporal fluctuation in response to several abiotic factors (Lindow,  
343 1996; Turner *et al.*, 2013). In addition, biotic factors, such as plant genotype, developmental  
344 stage or chemical composition are known to affect the microbiome (Delmotte *et al.*, 2009;  
345 Berlec, 2012; Bodenhausen *et al.*, 2014; Gargallo-Garriga *et al.*, 2016; González-Arenzana  
346 *et al.*, 2017). Consistently with previous results, we showed that the bacterial community of  
347 *P. lanceolata* is highly conserved and dominated by a set of core microorganisms, mainly  
348 OTUs classified as *Methylobacterium*, that are present in the majority of the samples. These  
349 epiphytic Alphaproteobacteria are particularly adapted to the plant phyllosphere and recycle  
350 parts of the metabolites secreted by the stomata (methanol and amino acids), and

351 contribute to plant quality, growth and defense (Sy *et al.*, 2005; Madhaiyan *et al.*, 2006;  
352 Kutschera, 2007; Madhaiyan *et al.*, 2015).

353 When considering the whole community structure of the plant microbiota, most of the taxa  
354 were correlated with the metabolite profile of the host plant, so that the microbiota tended  
355 to decrease with decreasing carbohydrates and amino acid residues. This suggests that  
356 these plant metabolites either drive the bacterial communities that successfully colonize the  
357 leaves or that the leaf bacterial communities impact plant metabolism. Somewhat  
358 surprisingly, the defensive compounds (iridoid glycosides and verbascoside) showed little  
359 variation and was not influenced by the plant microbiota.

360 In general, the microbial communities of host plants and caterpillars were very different. The  
361 predominant bacteria in the plants, such as *Methylobacterium* sp., *Hymenobacter* sp.,  
362 *Modestobacter* sp. and *Aureimonas* sp., were not dominant or even prevalent in the  
363 caterpillars. However, a high abundance of OTUs in the host plant did positively affect the  
364 same OTUs in the caterpillars in at least few taxonomic groups: in Methylobacteriaceae and  
365 some other Alphaproteobacteria, high abundance in the host plant increased their  
366 occurrence probabilities in the caterpillars, and in Cytophagaceae and some  
367 Methylobacteriaceae, high abundance in the host plant increased the OTU abundance in  
368 the caterpillars.

369 We suggest three potential reasons explaining the observed poor correspondence between  
370 caterpillars and host plant microbiota and/or metabolite composition. First, despite the high  
371 variability, the bacterial taxa associated with *M. cinxia* gut may be well adapted to their host  
372 and consequently little impacted by food intake, including the variation in secondary  
373 metabolites, such as iridoid glycosides and verbascoside concentrations. Second, the  
374 observed caterpillar gut microbiota variability might reflect high abundance of transient  
375 bacteria, which are rapidly acquired and eliminated with high turnover. Third, the microbiota  
376 of diapausing caterpillars may shift quickly in the beginning of the diapause, in the absence

377 of plant microbial load or metabolites ingested. Fourth, several species of Lepidoptera  
378 harbor horizontally acquired bacterial genes that detoxifies plants secondary metabolites.  
379 Such gene acquisitions might have relaxed any selective pressure in favor of the  
380 maintenance of bacterial symbionts within the gut leading to high variability of these  
381 communities (Hammer *et al.*, 2017; Paniagua Voirol *et al.*, 2018). Our observations are  
382 somewhat contrasting with other systems in which nutritionally acquired metabolites of the  
383 host plant have been observed to strongly shape the animal gut communities (Koropatkin  
384 *et al.*, 2012; Etxeberria *et al.*, 2013; Lu *et al.*, 2014; Xu *et al.*, 2016). Our results also contrast  
385 several other studies in insects that have highlighted the importance of host plant in shaping  
386 the gut microbiota community (Broderick *et al.*, 2004; Xiang *et al.*, 2006; Pinto-Tomás *et al.*,  
387 2011; Gayatri Priya *et al.*, 2012; Mason and Raffa, 2014; Berman *et al.*, 2018), including a  
388 study of actively feeding late instar stage of *M. cinxia* (Ruokolainen *et al.*, 2016). The  
389 microbiota of actively feeding individuals are evidently affected by the plant material that  
390 they feed on, which can lead to rapid and reversible changes in the microbiota community  
391 depending on the organic matter, defensive metabolites. In actively feeding caterpillars the  
392 microbiota found in fecal samples has been shown to resemble that of the host plant  
393 (Hammer *et al.*, 2017). Our result of microbiota in the midgut not representing similar  
394 microbial community to that of the host plant suggest that the bacterial community of the  
395 host plant is actively transported through the digestive tract of the caterpillar while they are  
396 eating plant material, and that this community is excreted through the feces and is not  
397 maintained within the gut of the caterpillar after they stopped eating. On the other hand, we  
398 cannot exclude the hypothesis that the excretion of the microbiota have happened during  
399 the molting right before the individuals enter into diapause. A recent study on several  
400 *Lycaenid* butterfly species showed that starved carnivorous or herbivorous caterpillars did  
401 not present any differences in their intestinal communities in comparison to each other  
402 (Whitaker *et al.*, 2016).

403



404 *The over-winter survival probability of caterpillars families is spatially structured but does*  
405 *not correlate with the microbiota or metabolite composition of the host plant*

406 We did not find any influence of microbiota composition on overwinter survival, but this may  
407 have been because our data on this was indirect. As the microbiota of the caterpillars from  
408 the same nest (i.e. family) did not resemble much each other, the microbiota of the sampled  
409 individuals was not likely to be representative of the microbiota of the individuals for which  
410 we scored survival. Previous studies on Lepidoptera have documented contradictory results  
411 on the impact of gut microbiota on survival. Experimental perturbation of *Manduca sexta*  
412 microbiota by antibiotic treatments had no effect on survival and development (Hammer *et*  
413 *al.*, 2017), whereas the removal of *Enterococcus munditii* symbionts colonizing *Galleria*  
414 *mellonella* decreased individual survival during the adult stage (Johnston and Rolff, 2015).  
415 The observed over-winter survival of the *M. cinxia* families in the wild exhibited some spatial  
416 structure, suggesting that the mortality is strongly influenced by some spatially  
417 autocorrelated environmental factor such as summer drought (Saastamoinen *et al.*, 2013;  
418 Tack *et al.*, 2015, Kahilainen *et al.* 2018) or host plant density, not accounted for in our  
419 study.

#### 420 *Conclusion*

421 The caterpillars of the Glanville fritillary butterfly present a highly variable gut microbiota  
422 even among caterpillars from the same family living on the same host plant individual.  
423 Variation in gut microbiota is predominantly related to Enterobacteriaceae, which show  
424 marked variation in their diversity among the individuals. Additionally, the occurrence  
425 probabilities of some OTUs were impacted by the presence of the parasitoid and by the sex  
426 of the caterpillar. The highly variable herbivore microbial communities differed markedly  
427 from those of the more conserved host plant microbiota communities. In particular, while  
428 the plant leaf metabolites influenced the plant microbiota, these effects did not penetrate to  
429 microbiota of the caterpillars feeding on those leaves. Future prospects on other

430 developmental stages (pupae, adults, eggs) should be conducted to broaden our  
431 understanding of the variation and potential role of the Glanville fritillary microbiota. Finally,  
432 we remark that joint species distribution modelling provides new opportunities to assess  
433 simultaneously the influences of both abiotic and biotic drivers on community variation.  
434 However, further development is required for making joint species distribution models fully  
435 compatible with sequencing data, and thus we hope future developments to implement  
436 multinomial observation models and the ability to capture discrete mixtures.

437

## 438 **Experimental Procedures**

### 439 *The study system*

440 The Glanville fritillary, *Melitaea cinxia*, butterfly occurs across the Eurasian continent, and  
441 in northern Europe has a univoltine life-cycle (Ehrlich and Hanski, 2004). In Finland, the  
442 butterfly occurs only in the SW archipelago, the Åland islands, where it persists as a classic  
443 metapopulation within a network of ~4.000 discrete habitat patches consisting of meadows  
444 and pastures (Ojanen *et al.*, 2013). The habitat patches have been annually surveyed since  
445 1993 for the presence of caterpillar family nests (Hanski, 1994; van Nouhuys and Hanski,  
446 2005; Ojanen *et al.*, 2013). Females lay clutches of eggs on two caterpillars host plant  
447 species, *Veronica spicata* and *Plantago lanceolata* (Kuussaari *et al.*, 2000). The gregarious  
448 caterpillars develop within the host plant, and in the fall, they build a thick and conspicuous  
449 winter nest, terminate feeding and molt into diapausing morphotype (Wahlberg, 2000). The  
450 diapause is broken in spring when the caterpillars continue their development until pupation.  
451 Approximately, 30% of the caterpillar families die during the winter (Tack *et al.*, 2015). In  
452 addition, a conserved proportion of approximately 30% of the individuals get infected by a  
453 specialist parasitoid *Hyposoter horticola* (Ehrlich and Hanski, 2004; Nouhuys and Ehrnsten,  
454 2004). The parasitism occurs during the egg stage, after which the parasitoid develops  
455 within the host until it hatches from the 7<sup>th</sup> instar caterpillars early in the spring and kills the

456 host. Several reasons make this system suitable for the present study: (i) the caterpillars  
457 and their host plant can be easily found from the field due to the gregarious life-history of  
458 the caterpillars and the conspicuous silk nest they spin for over-wintering; (ii) the over-  
459 wintering caterpillars are synchronized in their development prior diapause and have an  
460 empty gut at this developmental stage (Ojanen *et al.*, 2013), which reduces confounding  
461 factors in the analyses; (iii) several individuals, from mainly full-sib families (Fountain *et al.*,  
462 2018), can be sampled from the same over-wintering nest on one host plant individual,  
463 which allows us to assess individual variation both within and among families; (iv) the local  
464 populations are well-described due to the long-term ecological monitoring; and (v) the host  
465 sex can be identified at the caterpillar stage using molecular markers (Rastas *et al.*, 2013).

466

#### 467 *Sample collections*

468 Caterpillar and plant samples were collected from natural populations of the *M. cinxia* in the  
469 region of Sund in the Åland islands within three-day period in September 2015. This region  
470 was selected due to generally high occupancy of the butterfly in three connected networks  
471 ensuring sample availability (Supplementary material), and the possibility to control for  
472 some potentially confounding factors due to dominance of only one host plant species (*P.*  
473 *lanceolata*) and one specialist parasitoid species (*H. horticola*) (Nair *et al.*, 2016; Hanski *et*  
474 *al.*, 2017). The survey followed the general framework of the long-term survey of the *M.*  
475 *cinxia* butterfly (described in Ojanen *et al.*, 2013: a total of 189 dry meadows i.e. potential  
476 habitats) were surveyed for the presence of winter nests. Once located, the GPS  
477 coordinates were registered using the Earthcape biodiversity platform  
478 (<http://www.earthcape.com>). From each nest, three 5<sup>th</sup> instar caterpillars and one leaf from  
479 the host plant on which the caterpillars resided were collected with disinfected forceps and  
480 stored individually in sterile 1.5 ml and 15 ml tubes, respectively. A total of 191 caterpillars  
481 from 66 nests and 63 host plant samples were collected from the 15 patches that were

482 occupied by the butterfly in 2015. In few cases, the entire host plant had already been  
483 consumed, and hence no plant sample was collected. The caterpillars were dissected in  
484 order to detect the presence of the potential parasitoid and to separate midgut from rest of  
485 the carcass (for more details about sample conservation and preparation see  
486 Supplementary Material). Insect digestive tract is separated in three sections (foregut,  
487 midgut, hindgut) with often observed heterogeneity in their physiology but also in the  
488 composition of the microbial communities (Engel and Moran, 2013). Results on Lepidoptera  
489 have, however, been somewhat contradictory, with differences in the microbiome across  
490 the different gut sections being evident in *Spodoptera littoralis* (Tang et al., 2012) but not in  
491 *Bombix mori* (Chen et al., 2018). To avoid merging communities that potentially differ, we  
492 focused specifically on the microbiota localized within the midgut of the caterpillars. This  
493 section is the largest section, most important for food digestion, and its microbiota often  
494 shows interaction with host plant secondary metabolites (Terra and Ferreira, 2012; Pentzold  
495 et al., 2014). The over-winter survival of caterpillars nests in the field (i.e. from which the  
496 three individuals were sampled from) was assessed in the spring 2016, by checking the  
497 presence of active post-diapause caterpillars (Ojanen et al., 2013).

498

#### 499 *High throughput rrs amplicon sequencing*

500 DNA was extracted from midgut samples with Qiagen DNeasy Blood and Tissue kit  
501 (Qiagen, Germany) using an optimized protocol for extraction of bacterial DNA from low  
502 matrix (Minard et al., 2015). For plant samples, a piece of 0.5 cm<sup>2</sup> was separated from the  
503 center of the leaf, crushed in liquid nitrogen using a sterile pestle, and DNA was extracted  
504 following the protocol described for midgut samples. To avoid bias due to the possible  
505 confounding effect of extraction set, the samples were randomized before extraction. In  
506 addition, three independent extractions were carried out without any matrix and processed

507 with the rest of the samples to identify potential bacterial DNA contamination that could  
508 affect results obtained from low biomass samples (Salter *et al.*, 2014).

509 The 280bp hypervariable V5-V6 region of the *rrs* gene was amplified in duplicates and  
510 sequenced with Miseq v.3. sequencing platform (Illumina, U.S.A.). Details on the protocol  
511 are available in the Supplementary material. Analysis of sequences was performed using  
512 mothur v.1.37.6 following the Miseq Standard Operating Procedure described by the  
513 developers ([http://www.mothur.org/wiki/MiSeq\\_SOP](http://www.mothur.org/wiki/MiSeq_SOP)) (Schloss *et al.*, 2009). A total of  
514 16,710,206 sequences were obtained after alinement of forward and reverse reads. Aligned  
515 sequences were selected within a size range of 250-350 bp with less than 8 homopolymers  
516 and any ambiguous position. All sequences which did not align to the *rrs* Silva v.123  
517 database were filtered out. *De novo* chimera detection was performed using UCHIME  
518 implemented in mothur (Edgar *et al.*, 2011). Clustering was performed using a maximum of  
519 3% distance within each Operational Taxonomic Unit (OTU) according to the average  
520 neighbor method. After quality trimming and clustering, every contaminant sequence was  
521 trimmed out from the Sample x OTU shared table as previously described (Minard *et al.*,  
522 2015). The samples were first rarefied at 3000 reads in order to control for sequencing depth  
523 biases. Same OTUs were considered as contaminant if they were present in the negative  
524 controls and if their proportion in a given sample was not at least 10 times higher than their  
525 proportion in the negative controls. After trimming and quality control, the samples were  
526 rarefied at 1500 reads per sample for further analysis. 20 caterpillar samples and 2 plant  
527 samples, which did not contain the minimum amount of sequences, were discarded for the  
528 rest of the analysis. Miseq sequences have been deposited on the European Nucleotide  
529 Archive (<http://www.ebi.ac.uk/ena>) under the accession project number PRJEB26629.

530

531 *Metabolomic analysis of the leaf samples of host plant Plantago lanceolata*

532 After subtraction of the extremities, the remaining parts of each leaf sample were crushed  
533 with a sterile pestle in liquid nitrogen and the frozen powder was freeze dried for 48h. The  
534 extraction was processed using previously described protocol and <sup>1</sup>H-NMR spectra of the  
535 metabolites were recorded (Supplementary Material; Kim *et al.*, 2010). NMR spectra were  
536 processed with MNOVA software v.10.0.2 (Mestrelab research S.L., Spain). Model  
537 compounds of Aucubin (Sigma-Aldrich, Germany), Catalpol (Sigma-Aldrich, Germany) and  
538 Verbascoside (Extrasynthese, France) were used for signal assignments of *P. lanceolata*  
539 defensive metabolites. Other primary or secondary metabolite shifts, and J-coupling  
540 constants obtained from plant material using similar solvents were used as reference (Kim  
541 *et al.*, 2010; Lubbe *et al.*, 2011; Yang *et al.*, 2012; Agudelo-Romero *et al.*, 2014; Gallo *et*  
542 *al.*, 2014). For multivariate analysis, the signal was binned to 0.04 ppm and integrated. The  
543 TSP and Methanol signals were removed and the relative intensity of the chemical signals  
544 were normalized according to the dry mass of the samples and the TSP intensity.

545

#### 546 *Sex determination*

547 As caterpillar's sex cannot be determined based on morphology, we employed a panel of  
548 24 SNP markers linked to the Z chromosome to differentiate the sexes (Supplementary  
549 material, Supplementary Table S3, S4). The sensitivity and specificity of this method was  
550 estimated to be 0.81 and 0.89, respectively, based on a group of 150 adult individuals with  
551 known gender (75 males and 75 females). A total of 15 individuals could not be annotated  
552 based on the SNP panel.

553

#### 554 *Statistical analyses*

555 We analyzed the data with Hierarchical Modelling of Species Communities (HMSC;  
556 Ovaskainen *et al.*, 2017), which approach belongs to the class of joint species distribution

557 modeling (JSDM; Warton *et al.*, 2015). HMSC provides simultaneously species- and  
558 community-level inference on how species occurrences and/or abundances relate to  
559 environmental covariates, and how these relationships are structured with respect to  
560 species traits and phylogenetic relationships. HMSC additionally assesses the structure of  
561 co-occurrence patterns among the species that can't be attributed to responses of the  
562 species to the measured covariates, either in spatially hierarchical or in spatially explicit  
563 context, depending on the nature of the study design (Ovaskainen *et al.*, 2017).

564 We performed two separate analyses, called hereafter caterpillar and plant models, which  
565 differed in whether the OTU data were derived from caterpillar or plant material. In both  
566 models, the response variable was the vector of rarified sequence counts of the microbial  
567 OTUs. We employed a hurdle approach, in which we first used a probit model for OTU  
568 presence-absence, and then a log-normal model for OTU abundances conditional on  
569 presence. We restricted the analyses to OTUs that were present in at least five samples  
570 (562 and 610 OTUs for caterpillars and plants, respectively). We further excluded samples  
571 for which plant OTUs or metabolites were missing. The analyzed dataset consisted of 142  
572 caterpillars collected from 55 host plants (Fig. 2).

573 In the caterpillar model, our aim was to examine how the OTU composition depended on  
574 the properties of the focal caterpillar, and on the OTU and metabolite compositions of its  
575 host plant. We included as fixed effects (1) the sex of the individual (0 for female and 1 for  
576 male), (2) the infection status of the individual (0 for non-infected and 1 for infected by the  
577 parasitoid wasp), (3) the abundance of the focal OTU in the host plant where the individual  
578 was residing, (4) the plant OTU community composition, and (5) the plant metabolite  
579 composition. We measured plant OTU abundance as log-transformed sequence count and  
580 described plant OTU community composition and plant metabolite composition by the first  
581 three principal components that explained respectively 22% and 92% of their total variations  
582 (Supplementary Fig. S3, S7). To examine whether the responses of the species to the

583 explanatory variables showed a phylogenetic signal, we included in the analysis a  
584 phylogenetic correlation matrix among the OTUs, obtained with FastTree method assuming  
585 the General Time Reversible (GTR) evolution model (see Supplementary Fig. S8) (Price *et*  
586 *al.*, 2010). To examine residual co-occurrence patterns among the OTUs that cannot be  
587 attributed to the fixed effects, we further included in the model the level of the caterpillar  
588 nest (i.e. host plant level) as a spatial random effect, and the level of the individual  
589 caterpillars as a non-structured random effect. In the plant model, we included as the sole  
590 fixed effect the plant metabolite composition, and as the sole random effect the level of the  
591 level of the plant as a spatial random effect.

592 We fitted both the caterpillar and the plant models using the HMSC-Matlab implementation  
593 of Ovaskainen *et al.* (2017) with default prior distributions. To examine how much of the  
594 variation in OTU occurrences can be attributed to the fixed effects and to associations  
595 among the OTUs, we evaluated the predictive power of the model in three different ways.  
596 All of these accounted for the fixed effects, but differed on how the random effects were  
597 accounted for. Prediction P1 is aimed at measuring the predictive power based solely on  
598 fixed effects, and thus we integrated the random effects over their prior distributions rather  
599 than using sampling unit -specific fitted values. Prediction P2 is aimed at measuring the  
600 predictive power that can be gained by accounting for species-to-species associations. To  
601 generate P2, we split the species randomly to two groups, and made the predictions for  
602 each species group conditionally on the known occurrences of species belonging to the  
603 other group (see Supporting Information for details). Prediction P3 is aimed at measuring  
604 the full explanatory power of the model, and thus here the random effects were included  
605 based on their fitted values. Therefore, the performance of P1 measures the importance of  
606 fixed effects, and the difference between P2 and P1 (respectively, between P3 and P1)  
607 gives a minimum (respectively, maximum) estimate for the importance of species-to-  
608 species associations. This is because the difference between P3 and P2 may either be a  
609 true effect of species-to-species associations that is not captured by our approach of



610 dividing the species into two groups, or then it may be due to overfitting of the random  
611 effects. We measured predictive powers by Tjur's  $R^2$  (Tjur, 2009) for the probit models and  
612 standard  $R^2$  for the log-normal models. Given that HMSC framework has not previously  
613 been used in microorganism studies and may thus not be familiar to microbial scientific  
614 community, we ran a series of complementary analyses with more traditional methods to  
615 support our HMSC-based results. The details are given in Supplementary material.

616 Finally, we analyzed whether the overwintering survival of caterpillar nests (siblings of the  
617 caterpillars assessed above) was dependent on metabolite and OTU composition of the  
618 host plant they were residing on. We performed this analysis with a logistic regression model  
619 estimated with STAN (Carpenter *et al.*, 2017), in which model we accounted for the spatial  
620 locations of the nests using a Gaussian process approach (see Supplementary material)  
621 (Rasmussen and Williams, 2006).

622

623

624 **Acknowledgements:** Funding for this project was provided by grants of the European  
625 Research Council (Independent Starting grant no. 637412 'META-STRESS' to MS) and the  
626 Academy of Finland (Decision numbers 273098 and 265641 to MS and 1273253, 250444  
627 and 284601 to OO) and the Research Council of Norway (CoE grant 223257), as well as  
628 by the Biocenter Finland related to the NMR core facility at the Institute on Biotechnology.  
629 We acknowledge Juha-Matti Pitkänen for help with DNA extraction, Sami Ojanen for the  
630 coordination of sampling, and field assistants for sample collection. We would also like to  
631 thank Aapo Kahilainen for his help with genotyping analysis.

632

### 633 **Conflict of Interest**

634 The authors declare no conflict of interest.

635

## 636 References

- 637 Adair, K.L., Wilson, M., Bost, A., and Douglas, A.E. (2018) Microbial community assembly  
638 in wild populations of the fruit fly *Drosophila melanogaster*. *ISME J.* **12**: 959–972.
- 639 Agudelo-Romero, P., Ali, K., Choi, Y.H., Sousa, L., Verpoorte, R., Tiburcio, A.F., and  
640 Fortes, A.M. (2014) Perturbation of polyamine catabolism affects grape ripening of  
641 *Vitis vinifera* cv. Trincadeira. *Plant Physiol. Biochem.* **74**: 141–155.
- 642 Akman Gunduz, E. and Douglas, A.E. (2009) Symbiotic bacteria enable insect to use a  
643 nutritionally inadequate diet. *Proc. R. Soc. B Biol. Sci.* **276**: 987–991.
- 644 Berlec, A. (2012) Novel techniques and findings in the study of plant microbiota: Search  
645 for plant probiotics. *Plant Sci.* **193–194**: 96–102.
- 646 Berman, T.S., Laviad-Shitrit, S., Lalzar, M., Halpern, M., and Inbar, M. (2018) Cascading  
647 effects on bacterial communities: cattle grazing causes a shift in the microbiome of  
648 a herbivorous caterpillar. *ISME J.* **12**: 1952–1963.
- 649 Bodenhausen, N., Bortfeld-Miller, M., Ackermann, M., and Vorholt, J.A. (2014) A synthetic  
650 community approach reveals plant genotypes affecting the phyllosphere  
651 microbiota. *PLoS Genet* **10**: e1004283.
- 652 Broderick, N.A., Raffa, K.F., Goodman, R.M., and Handelsman, J. (2004) Census of the  
653 bacterial community of the gypsy moth larval midgut by using culturing and culture-  
654 independent methods. *Appl. Environ. Microbiol.* **70**: 293–300.
- 655 Carpenter, B., Gelman, A., Hoffman, M., Lee, D., Goodrich, B., Betancourt, M., et al.  
656 (2017) Stan: A probabilistic programming language. *J. Stat. Softw.* **76**: 1–32.
- 657 Ceja-Navarro, J.A., Vega, F.E., Karaoz, U., Hao, Z., Jenkins, S., Lim, H.C., et al. (2015)  
658 Gut microbiota mediate caffeine detoxification in the primary insect pest of coffee.  
659 *Nat. Commun.* **6**: 7618.
- 660 Chandler, J.A., Lang, J.M., Bhatnagar, S., Eisen, J.A., and Kopp, A. (2011) Bacterial  
661 communities of diverse *Drosophila* species: ecological context of a host-microbe  
662 model system. *PLoS Genet.* **7**: e1002272.
- 663 Chen, B., Teh, B.-S., Sun, C., Hu, S., Lu, X., Boland, W., and Shao, Y. (2016) Biodiversity  
664 and activity of the gut microbiota across the life history of the insect herbivore  
665 *Spodoptera littoralis*. *Sci. Rep.* **6**: 29505.
- 666 Cusumano, A., Zhu, F., Volkoff, A.-N., Verbaarschot, P., Bloem, J., Vogel, H., et al. (2018)  
667 Parasitic wasp-associated symbiont affects plant-mediated species interactions  
668 between herbivores. *Ecol. Lett.* **21**: 957–967.
- 669 Delmotte, N., Knief, C., Chaffron, S., Innerebner, G., Roschitzki, B., Schlapbach, R., et al.  
670 (2009) Community proteogenomics reveals insights into the physiology of  
671 phyllosphere bacteria. *Proc. Natl. Acad. Sci. U. S. A.* **106**: 16428–16433.
- 672 Douglas, A.E. (2011) Lessons from studying insect symbioses. *Cell Host Microbe* **10**:  
673 359–367.
- 674 Douglas, A.E. (2015) Multiorganismal insects: diversity and function of resident  
675 microorganisms. *Annu. Rev. Entomol.* **60**: 17–34.
- 676 Douglas, A.E. (1998) Nutritional interactions in insect-microbial symbioses: aphids and  
677 their symbiotic bacteria *Buchnera*. *Annu. Rev. Entomol.* **43**: 17–37.
- 678 Douglas, A.E. (2010) The symbiotic habit. Princeton University Press.
- 679 Dunbar, H.E., Wilson, A.C.C., Ferguson, N.R., and Moran, N.A. (2007) Aphid thermal  
680 tolerance is governed by a point mutation in bacterial symbionts. *PLoS Biol* **5**: e96.
- 681 Duplouy, A., Couchoux, C., Hanski, I., and Nouhuys, S. van (2015) *Wolbachia* infection in  
682 a natural parasitoid wasp population. *PLOS ONE* **10**: e0134843.
- 683 Duplouy, A. and Horneet, E.A. (2018) Uncovering the hidden players in Lepidoptera  
684 biology: the heritable microbial endosymbionts. *PeerJ Inc* **6**: e4629

- 685 Edgar, R.C., Haas, B.J., Clemente, J.C., Quince, C., and Knight, R. (2011) UCHIME  
686 improves sensitivity and speed of chimera detection. *Bioinformatics* **27**: 2194–  
687 2200.
- 688 Ehrlich, P.R. and Hanski, I. (2004) On the wings of checkerspots: a model system for  
689 population biology. Oxford University Press, USA.
- 690 Engel, P. and Moran, N.A. (2013) The gut microbiota of insects – diversity in structure and  
691 function. *FEMS Microbiol. Rev.* **37**: 699–735.
- 692 Engelstädter, J. and Hurst, G.D.D. (2009) The ecology and evolution of microbes that  
693 manipulate host reproduction. *Annu. Rev. Ecol. Evol. Syst.* **40**: 127–149.
- 694 Etxeberria, U., Fernández-Quintela, A., Milagro, F.I., Aguirre, L., Martínez, J.A., and  
695 Portillo, M.P. (2013) Impact of polyphenols and polyphenol-rich dietary sources on  
696 gut microbiota composition. *J. Agric. Food Chem.* **61**: 9517–9533.
- 697 Fountain, T., Husby, A., Nonaka, E., DiLeo, M.F., Korhonen, J.H., Rastas, P., et al. (2018)  
698 Inferring dispersal across a fragmented landscape using reconstructed families in  
699 the Glanville fritillary butterfly. *Evol. Appl.* **11**: 287–297.
- 700 Frago, E., Mala, M., Weldegergis, B.T., Yang, C., McLean, A., Godfray, H.C.J., et al.  
701 (2017) Symbionts protect aphids from parasitic wasps by attenuating herbivore-  
702 induced plant volatiles. *Nat. Commun.* **8**: 1860.
- 703 Gallo, V., Mastroianni, P., Cafagna, I., Nitti, G.I., Latronico, M., Longobardi, F., et al. (2014)  
704 Effects of agronomical practices on chemical composition of table grapes  
705 evaluated by NMR spectroscopy. *J. Food Compos. Anal.* **35**: 44–52.
- 706 Gargallo-Garriga, A., Sardans, J., Pérez-Trujillo, M., Guenther, A., Llusà, J., Rico, L., et  
707 al. (2016) Shifts in plant foliar and floral metabolomes in response to the  
708 suppression of the associated microbiota. *BMC Plant Biol.* **16**: 78.
- 709 Gayatri Priya, N., Ojha, A., Kajla, M.K., Raj, A., and Rajagopal, R. (2012) Host plant  
710 induced variation in gut bacteria of *Helicoverpa armigera*. *PLoS ONE* **7**: e30768.
- 711 González-Arenzana, L., Portu, J., López, R., Garijo, P., Garde-Cerdán, T., and López-  
712 Alfaro, I. (2017) Phenylalanine and urea foliar application: Effect on grape and  
713 must microbiota. *Int. J. Food Microbiol.* **245**: 88–97.
- 714 Hammer, T.J., Janzen, D.H., Hallwachs, W., Jaffe, S.P., and Fierer, N. (2017) Caterpillars  
715 lack a resident gut microbiome. *Proc. Natl. Acad. Sci. U. S. A.* **114**: 9641–9646.
- 716 Hammer, T.J., McMillan, W.O., and Fierer, N. (2014) Metamorphosis of a butterfly-  
717 associated bacterial community. *PLOS ONE* **9**: e86995.
- 718 Hanski, I. (1994) A practical model of metapopulation dynamics. *J. Anim. Ecol.* **63**: 151–  
719 162.
- 720 Hanski, I., Schulz, T., Wong, S.C., Ahola, V., Ruokolainen, A., and Ojanen, S.P. (2017)  
721 Ecological and genetic basis of metapopulation persistence of the Glanville fritillary  
722 butterfly in fragmented landscapes. *Nat. Commun.* **8**: 14504.
- 723 Johnston, P.R. and Rolff, J. (2015) Host and symbiont jointly control gut microbiota during  
724 complete metamorphosis. *PLOS Pathog* **11**: e1005246.
- 725 Kennedy Peter G. and Bruns Thomas D. (2005) Priority effects determine the outcome of  
726 ectomycorrhizal competition between two *Rhizopogon* species colonizing *Pinus*  
727 *muricata* seedlings. *New Phytol.* **166**: 631–638.
- 728 Kikuchi, Y., Hayatsu, M., Hosokawa, T., Nagayama, A., Tago, K., and Fukatsu, T. (2012)  
729 Symbiont-mediated insecticide resistance. *Proc. Natl. Acad. Sci.* **109**: 8618-8622.
- 730 Kim, H.K., Choi, Y.H., and Verpoorte, R. (2010) NMR-based metabolomic analysis of  
731 plants. *Nat. Protoc.* **5**: 536–549.
- 732 King, K.C., Brockhurst, M.A., Vasieva, O., Paterson, S., Betts, A., Ford, S.A., et al. (2016)  
733 Rapid evolution of microbe-mediated protection against pathogens in a worm host.  
734 *ISME J.* **10**: 1915–1924.
- 735 Koropatkin, N.M., Cameron, E.A., and Martens, E.C. (2012) How glycan metabolism  
736 shapes the human gut microbiota. *Nat. Rev. Microbiol.* **10**: 323–335.
- 737 Kutschera, U. (2007) Plant-associated methylbacteria as co-evolved phytosymbionts.  
738 *Plant Signal. Behav.* **2**: 74–78.

- 739 Kuussaari, M., Singer, M., and Hanski, I. (2000) Local specialization and landscape-level  
740 influence on host use in an herbivorous insect. *Ecology* **81**: 2177–2187.
- 741 Lindow, S.E. (1996) Role of immigration and other processes in determining epiphytic  
742 bacterial populations. In, Morris, C.E., Nicot, P.C., and Nguyen-The, C. (eds), *Aerial*  
743 *Plant Surface Microbiology*. Springer US, pp. 155–168.
- 744 Lu, K., Abo, R.P., Schlieper, K.A., Graffam, M.E., Levine, S., Wishnok, J.S., et al. (2014)  
745 Arsenic exposure perturbs the gut microbiome and its metabolic profile in mice: an  
746 integrated metagenomics and metabolomics analysis. *Environ. Health Perspect.*  
747 **122**: 284–291.
- 748 Lubbe, A., Choi, Y.H., Vreeburg, P., and Verpoorte, R. (2011) Effect of fertilizers on  
749 galanthamine and metabolite profiles in Narcissus bulbs by 1H NMR. *J. Agric.*  
750 *Food Chem.* **59**: 3155–3161.
- 751 Macke, E., Tasiemski, A., Massol, F., Callens, M., and Decaestecker, E. (2017) Life  
752 history and eco-evolutionary dynamics in light of the gut microbiota. *Oikos* **126**:  
753 508–531.
- 754 Madhaiyan, M., Alex, T.H.H., Ngoh, S.T., Prithviraj, B., and Ji, L. (2015) Leaf-residing  
755 *Methylobacterium* species fix nitrogen and promote biomass and seed production  
756 in *Jatropha curcas*. *Biotechnol. Biofuels* **8**: 222.
- 757 Madhaiyan, M., Reddy, B.V.S., Anandham, R., Senthilkumar, M., Poonguzhali, S.,  
758 Sundaram, S.P., and Sa, T. (2006) Plant growth-promoting *Methylobacterium*  
759 induces defense responses in groundnut (*Arachis hypogaea* L.) compared with rot  
760 pathogens. *Curr. Microbiol.* **53**: 270–276.
- 761 Mason, C.J. and Raffa, K.F. (2014) Acquisition and structuring of midgut bacterial  
762 communities in gypsy moth (Lepidoptera: Erebidae) larvae. *Environ. Entomol.* **43**:  
763 595–604.
- 764 McFall-Ngai, M., Hadfield, M.G., Bosch, T.C.G., Carey, H.V., Domazet-Lošo, T., Douglas,  
765 A.E., et al. (2013) Animals in a bacterial world, a new imperative for the life  
766 sciences. *Proc. Natl. Acad. Sci.* **110**: 3229–3236.
- 767 Minard, G., Tran, F.H., Van, V.T., Goubert, C., Bellet, C., Lambert, G., et al. (2015) French  
768 invasive Asian tiger mosquito populations harbor reduced bacterial microbiota and  
769 genetic diversity compared to Vietnamese autochthonous relatives. *Front.*  
770 *Microbiol.* **6**: 970.
- 771 Montllor, C.B., Maxmen, A., and Purcell, A.H. (2002) Facultative bacterial endosymbionts  
772 benefit pea aphids *Acyrtosiphon pisum* under heat stress. *Ecol. Entomol.* **27**:  
773 189–195.
- 774 Mrinalini, Siebert, A.L., Wright, J., Martinson, E., Wheeler, D., and Werren, J.H. (2015)  
775 Parasitoid venom induces metabolic cascades in fly hosts. *Metabolomics* **11**: 350–  
776 366.
- 777 Nair, A., Fountain, T., Ikonen, S., Ojanen, P.S., and van Nouhuys, S. (2016) Spatial and  
778 temporal genetic structure at the fourth trophic level in a fragmented landscape.  
779 *Proc. R. Soc. B Biol. Sci.* **283**: 20160668.
- 780 van Nouhuys, S. van and Ehrnsten, J. (2004) Wasp behavior leads to uniform parasitism  
781 of a host available only a few hours per year. *Behav. Ecol.* **15**: 661–665.
- 782 van Nouhuys, S. and Hanski, I. (2005) Metacommunities of butterflies, their host plants,  
783 and their parasitoids. *Metacommunities Spat. Dyn. Ecol. Communities* Pp. 99–121.
- 784 Ojanen, S.P., Nieminen, M., Meyke, E., Pöyry, J., and Hanski, I. (2013) Long-term  
785 metapopulation study of the Glanville fritillary butterfly (*Melitaea cinxia*): survey  
786 methods, data management, and long-term population trends. *Ecol. Evol.* **3**: 3713–  
787 3737.
- 788 Ovaskainen, O., Tikhonov, G., Norberg, A., Guillaume Blanchet, F., Duan, L., Dunson, D.,  
789 et al. (2017) How to make more out of community data? A conceptual framework  
790 and its implementation as models and software. *Ecol. Lett.* **20**: 561–576.

- 791 Paniagua Voirol, L.R., Frago, E., Kaltenpoth, M., Hilker, M., and Fatouros, N.E. (2018)  
792 Bacterial symbionts in Lepidoptera: their diversity, transmission, and impact on the  
793 host. *Front. Microbiol.* **9**: 556.
- 794 Parmentier, L., Meeus, I., Mosallanejad, H., Graaf, D.C. de, and Smagghe, G. (2016)  
795 Plasticity in the gut microbial community and uptake of Enterobacteriaceae  
796 (Gammaproteobacteria) in *Bombus terrestris* bumblebees' nests when reared  
797 indoors and moved to an outdoor environment. *Apidologie* **47**: 237–250.
- 798 Peay, K.G., Belisle, M., and Fukami, T. (2012) Phylogenetic relatedness predicts priority  
799 effects in nectar yeast communities. *Proc. Biol. Sci.* **279**: 749–758.
- 800 Pentzold, S., Zagrobelny, M., Rook, F., and Bak, S. (2014) How insects overcome two-  
801 component plant chemical defence: plant  $\beta$ -glucosidases as the main target for  
802 herbivore adaptation. *Biol. Rev.* **89**: 531–551.
- 803 Pinto-Tomás, A.A., Sittenfeld, A., Uribe-Lorío, L., Chavarría, F., Mora, M., Janzen, D.H., et  
804 al. (2011) Comparison of midgut bacterial diversity in tropical caterpillars  
805 (Lepidoptera: Saturniidae) fed on different diets. *Environ. Entomol.* **40**: 1111–1122.
- 806 Potter, K.A. and Woods, H.A. (2012) Trichogramma parasitoids alter the metabolic  
807 physiology of *Manduca* eggs. *Proc. R. Soc. B Biol. Sci.* **279**: 3572–3576.
- 808 Price, M.N., Dehal, P.S., and Arkin, A.P. (2010) FastTree 2 – approximately maximum-  
809 likelihood trees for large alignments. *PLOS ONE* **5**: e9490.
- 810 Rani, A., Sharma, A., Rajagopal, R., Adak, T., and Bhatnagar, R.K. (2009) Bacterial  
811 diversity analysis of larvae and adult midgut microflora using culture-dependent  
812 and culture-independent methods in lab-reared and field-collected *Anopheles*  
813 *stephensi*-an Asian malarial vector. *BMC Microbiol.* **9**: 96.
- 814 Rasmussen, C.E. and Williams, C.K.I. (2006) Gaussian processes for machine learning  
815 MIT Press, Cambridge, Mass.
- 816 Rastas, P., Paulin, L., Hanski, I., Lehtonen, R., and Auvinen, P. (2013) Lep-MAP: fast and  
817 accurate linkage map construction for large SNP datasets. *Bioinforma. Oxf. Engl.*  
818 **29**: 3128–3134.
- 819 Ruokolainen, L., Ikonen, S., Makkonen, H., and Hanski, I. (2016) Larval growth rate is  
820 associated with the composition of the gut microbiota in the Glanville fritillary  
821 butterfly. *Oecologia* **181**: 895–903.
- 822 Saastamoinen, M., Ikonen, S., Wong, S.C., Lehtonen, R., and Hanski, I. (2013) Plastic  
823 larval development in a butterfly has complex environmental and genetic causes  
824 and consequences for population dynamics. *J. Anim. Ecol.* **82**: 529–539.
- 825 Salem, H., Bauer, E., Strauss, A.S., Vogel, H., Marz, M., and Kaltenpoth, M. (2014)  
826 Vitamin supplementation by gut symbionts ensures metabolic homeostasis in an  
827 insect host. *Proc. R. Soc. Lond. B Biol. Sci.* **281**: 20141838.
- 828 Salter, S., Cox, M.J., Turek, E.M., Calus, S.T., Cookson, W.O., Moffatt, M.F., et al. (2014)  
829 Reagent and laboratory contamination can critically impact sequence-based microbiome  
830 analyses. *BMC Biol.* **12**: 87.
- 831 Schloss, P.D., Westcott, S.L., Ryabin, T., Hall, J.R., Hartmann, M., Hollister, E.B., et al.  
832 (2009) Introducing mothur: open-source, platform-independent, community-  
833 supported software for describing and comparing microbial communities. *Appl.*  
834 *Environ. Microbiol.* **75**: 7537–7541.
- 835 Shapira, M. (2016) Gut microbiotas and host evolution: scaling up symbiosis. *Trends Ecol.*  
836 *Evol.* **31**: 539–549.
- 837 Sprockett, D., Fukami, T., and Relman, D.A. (2018) Role of priority effects in the early-life  
838 assembly of the gut microbiota. *Nat. Rev. Gastroenterol. Hepatol.* **15**: 197–205.
- 839 Staubach, F., Baines, J.F., Künzel, S., Bik, E.M., and Petrov, D.A. (2013) Host species  
840 and environmental effects on bacterial communities associated with *Drosophila* in  
841 the laboratory and in the natural environment. *PloS One* **8**: e70749.

- 842 Staudacher, H., Kaltenpoth, M., Breeuwer, J.A.J., Menken, S.B.J., Heckel, D.G., and  
843 Groot, A.T. (2016) Variability of bacterial communities in the moth *Heliothis*  
844 *virescens* indicates transient association with the host. *PLOS One* **11**: e0154514.
- 845 Sun, Z., Lu, Y., Zhang, H., Kumar, D., Liu, B., Gong, Y., et al. (2016) Effects of BmCPV  
846 infection on silkworm *Bombyx mori* intestinal bacteria. *PloS One* **11**: e0146313.
- 847 Sy, A., Timmers, A.C.J., Knief, C., and Vorholt, J.A. (2005) Methylotrophic metabolism is  
848 advantageous for *Methylobacterium extorquens* during colonization of *Medicago*  
849 *truncatula* under competitive conditions. *Appl. Environ. Microbiol.* **71**: 7245–7252.
- 850 Tack, A.J., Mononen, T., and Hanski, I. (2015) Increasing frequency of low summer  
851 precipitation synchronizes dynamics and compromises metapopulation stability in  
852 the Glanville fritillary butterfly. In, *Proc. R. Soc. B. The Royal Society*, p. 20150173.
- 853 Tan, C.-W., Peiffer, M., Hoover, K., Rosa, C., Acevedo, F.E., and Felton, G.W. (2018)  
854 Symbiotic polydnavirus of a parasite manipulates caterpillar and plant immunity.  
855 *Proc. Natl. Acad. Sci.* **115**: 5199–5204.
- 856 Terra, W.R. and Ferreira, C. (2012) 11 - Biochemistry and molecular biology of digestion.  
857 In, Gilbert, L.I. (ed), *Insect Molecular Biology and Biochemistry*. Academic Press,  
858 San Diego, pp. 365–418.
- 859 Tinker, K.A. and Ottesen, E.A. (2016) The core gut microbiome of the American  
860 cockroach, *Periplaneta americana*, is stable and resilient to dietary shifts. *Appl.*  
861 *Environ. Microbiol.* **82**: 6603–6610.
- 862 Tjur, T. (2009) Coefficients of determination in logistic regression models—A new  
863 proposal: The coefficient of discrimination. *Am. Stat.* **63**: 366–372.
- 864 Turner, T.R., James, E.K., and Poole, P.S. (2013) The plant microbiome. *Genome Biol.*  
865 **14**: 209.
- 866 Wahlberg, N. (2000) Comparative descriptions of the immature stages and ecology of five  
867 Finnish melitaeine butterfly species (Lepidoptera: Nymphalidae). *Ann. Zool. Fenn.*  
868 **11**: 167–174.
- 869 Warnecke, F., Luginbühl, P., Ivanova, N., Ghassemian, M., Richardson, T.H., Stege, J.T.,  
870 et al. (2007) Metagenomic and functional analysis of hindgut microbiota of a wood-  
871 feeding higher termite. *Nature* **450**: 560–565.
- 872 Warton, D.I., Blanchet, F.G., O'Hara, R.B., Ovaskainen, O., Taskinen, S., Walker, S.C.,  
873 and Hui, F.K.C. (2015) So many variables: Joint modeling in community ecology.  
874 *Trends Ecol. Evol.* **30**: 766–779.
- 875 Weiss, B.L., Mouchotte, R., Rio, R.V.M., Wu, Y.-N., Wu, Z., Heddi, A., and Aksoy, S.  
876 (2006) Interspecific transfer of bacterial endosymbionts between tsetse fly species:  
877 infection establishment and effect on host fitness. *Appl. Environ. Microbiol.* **72**:  
878 7013–7021.
- 879 Werren, J.H., Baldo, L., and Clark, M.E. (2008) *Wolbachia*: master manipulators of  
880 invertebrate biology. *Nat. Rev. Microbiol.* **6**: 741–751.
- 881 Whitaker, M.R.L., Salzman, S., Sanders, J., Kaltenpoth, M., and Pierce, N.E. (2016)  
882 Microbial communities of lycaenid butterflies do not correlate with larval diet. *Front.*  
883 *Microbiol.* **7**: 1920.
- 884 Xiang, H., Wei, G.-F., Jia, S., Huang, J., Miao, X.-X., Zhou, Z., et al. (2006) Microbial  
885 communities in the larval midgut of laboratory and field populations of cotton  
886 bollworm (*Helicoverpa armigera*). *Can. J. Microbiol.* **52**: 1085–1092.
- 887 Xu, L., Shi, Z., Wang, B., Lu, M., and Sun, J. (2016) Pine defensive monoterpene  $\alpha$ -  
888 pinene influences the feeding behavior of *Dendroctonus valens* and its gut  
889 bacterial community structure. *Int. J. Mol. Sci.* **17**: 1734.
- 890 Yang, S.-O., Shin, Y.-S., Hyun, S.-H., Cho, S., Bang, K.-H., Lee, D., et al. (2012) NMR-  
891 based metabolic profiling and differentiation of ginseng roots according to  
892 cultivation ages. *J. Pharm. Biomed. Anal.* **58**: 19–26.
- 893 Yun, J.-H., Roh, S.W., Whon, T.W., Jung, M.-J., Kim, M.-S., Park, D.-S., et al. (2014)  
894 Insect gut bacterial diversity determined by environmental habitat, diet,

895 developmental stage, and phylogeny of host. *Appl. Environ. Microbiol.* **80**: 5254–  
896 5264.  
897 Zeng, Q., Sukumaran, J., Wu, S., and Rodrigo, A. (2015) Neutral models of microbiome  
898 evolution. *PLOS Comput. Biol.* **11**: e1004365.  
899 Zhang, Y., Yu, X., Shen, W., Ma, Y., Zhou, L., Xu, N., and Yi, S. (2010) Mechanism of  
900 fluorescent cocoon sex identification for silkworms *Bombyx mori*. *Sci. China Life*  
901 *Sci.* **53**: 1330–1339.  
902 Zhu, F., Cusumano, A., Bloem, J., Weldegergis, B.T., Villela, A., Fatouros, N.E., et al.  
903 (2018) Symbiotic polydnavirus and venom reveal parasitoid to its hyperparasitoids.  
904 *Proc. Natl. Acad. Sci.* **115**: 5205–5210.  
905

906

907

## 908 **Table and Figure legends**

909

910 **Table 1. Estimates of the community-consistent fixed effects included in the**  
911 **modeling of the bacterial communities associated with larvae and their host plant.**

912

913 **Figure 1. Prevalence and average abundance of the bacteria within caterpillar**  
914 **midguts (A) and plant leaves (B).** The OTUs (dots) are represented according to the  
915 proportion of individual samples in which they were detected (prevalence) and their average  
916 relative abundance across all the samples (abundance). The classification of the most  
917 abundant OTUs (cutoff > 0.1) is provided. The bootstrap associated with each taxonomical  
918 classification is reported under brackets.

919

920 **Figure 2. Abundances of bacterial OTUs in caterpillar and plant samples.** The OTUs  
921 (columns) have been ordered according to their taxonomical classification (for details, see  
922 Supplementary Table S2). The color scale shows OTU abundance (number of normalized  
923 sequences) for each caterpillar and plant sample on a logarithmic scale, and white color  
924 indicates absence of OTU in given sample.

925

926 **Figure 3. Partitioning of variation in caterpillar microbiota to components explained**  
927 **by different types of fixed and random effects.** The colored bars show, for each OTU,  
928 the proportions of variance attributed to each group of explanatory variables. The average  
929 variance proportions over OTUs are shown in the legend, with P-A corresponding to the  
930 presence-absence and Ab to the abundance model. The order of OTUs is following the  
931 ordering of Fig. 2 except for OTUs that were recorded only in plant samples and are omitted  
932 here (for details, see Supplementary Table S2). See *Statistical Methods* for a full description  
933 of the included fixed and random effects.

934

935 **Figure 4. Influence of measured covariates on caterpillar microbiota.** Regression  
936 coefficients that were estimated to be positive (respectively, negative) with 95% credibility  
937 level are shown by red (respectively, blue). The ordering of OTUs is identical to that of Fig.  
938 2 except for OTUs that were recorded only in plant samples and are omitted here (for

939 details, see Supplementary Table S2). The covariates included in the model are listed in  
940 the legend alongside with their running names used in axis labelling.

941

942 **Figure 5. Residual associations among caterpillar microbiota.** The panels illustrate the  
943 caterpillar-level random effects for the presence-absence (A) and abundance (B) parts of  
944 the caterpillar model. OTU-pairs for which the residual correlation was estimated to be  
945 positive (respectively, negative) with 95% credibility level are shown by red (respectively,  
946 blue) color. The ordering of OTUs is identical to that of Fig. 2 except for OTUs that were  
947 recorded only in plant samples and are omitted here (for details, see Supplementary Table  
948 S2).

949

950 **Figure 6. Metabolomic analysis of *Plantago lanceolata* leaves.** (A) An example  
951 spectrum (binned at 0.04 ppm) obtained for a leaf sample of *Pl. lanceolata* and showing the  
952 chemical shift of the different annotated metabolites. The gap within the graph represents  
953 the removal of the solvent pick. (B) A heatmap of the different binned signals showing their  
954 normalized intensity accross all plant samples.

955

956

957

958

959

960

961

962

963

964

965

966

967

968

969

970

971

972

973

974



**Table 1. Estimates of the community-consistent fixed effects included in the modeling of the bacterial communities associated with larvae and their host plant**

| Dependant variable                     | Model                             | Fixed effects          | Bayesian posterior credibility quantiles |                |                |               |
|----------------------------------------|-----------------------------------|------------------------|------------------------------------------|----------------|----------------|---------------|
|                                        |                                   |                        | 5                                        | 50             | 95             |               |
| Bacterial microbiota of the larvae     | Presence - absence <sup>(1)</sup> | Intercept              | <b>-2.2595</b>                           | <b>-2.0510</b> | <b>-1.8332</b> |               |
|                                        |                                   | Parasitoid             | -0.4452                                  | -0.2012        | 0.0458         |               |
|                                        |                                   | Gender                 | -0.4595                                  | -0.1849        | 0.0686         |               |
|                                        |                                   | Log-abundance          | -0.2850                                  | 0.1029         | 0.4647         |               |
|                                        |                                   | Host plant microbiota  | otuPC1                                   | -0.0276        | 0.0026         | 0.0337        |
|                                        |                                   |                        | otuPC2                                   | -0.0013        | 0.0250         | 0.0501        |
|                                        |                                   |                        | otuPC3                                   | -0.0129        | 0.0139         | 0.0412        |
|                                        |                                   | Host plant metabolites | metPC1                                   | -0.3854        | 0.3375         | 1.1096        |
|                                        |                                   |                        | metPC2                                   | -3.4100        | -1.1830        | 0.9640        |
|                                        | metPC3                            |                        | -3.3508                                  | -0.7631        | 1.6828         |               |
|                                        | Abundance <sup>(2)</sup>          | Intercept              | -0.1610                                  | 0.4370         | 1.0211         |               |
|                                        |                                   | Parasitoid             | -0.1868                                  | 0.0231         | 0.2182         |               |
|                                        |                                   | Gender                 | -0.2676                                  | -0.0629        | 0.1545         |               |
|                                        |                                   | Log-abundance          | -0.1801                                  | 0.2794         | 0.7267         |               |
|                                        |                                   | Host plant microbiota  | otuPC1                                   | -0.0273        | -0.0042        | 0.0151        |
|                                        |                                   |                        | otuPC2                                   | -0.0206        | -0.0006        | 0.0199        |
|                                        |                                   |                        | otuPC3                                   | -0.0367        | -0.0066        | 0.0186        |
|                                        |                                   | Host plant metabolites | metPC1                                   | -0.4520        | 0.2026         | 0.8203        |
| metPC2                                 |                                   |                        | -2.0163                                  | -0.2071        | 1.5288         |               |
| metPC3                                 | -2.2270                           |                        | -0.3142                                  | 1.6078         |                |               |
| Bacterial microbiota of the host plant | Presence - absence <sup>(1)</sup> | Intercept              | <b>-1.078</b>                            | <b>-1.0384</b> | <b>-0.9910</b> |               |
|                                        |                                   | metPC1                 | <b>-0.5839</b>                           | <b>-0.4650</b> | <b>-0.3425</b> |               |
|                                        |                                   | Host plant metabolites | metPC2                                   | -0.3293        | 0.0231         | 0.3354        |
|                                        | metPC3                            |                        | <b>-1.0213</b>                           | <b>-0.6262</b> | <b>-0.2519</b> |               |
|                                        | Abundance <sup>(2)</sup>          |                        | Intercept                                | <b>0.4941</b>  | <b>0.5369</b>  | <b>0.5728</b> |
|                                        |                                   | metPC1                 | <b>0.0102</b>                            | <b>0.0951</b>  | <b>0.1943</b>  |               |
|                                        |                                   | Host plant metabolites | metPC2                                   | -0.4569        | -0.1740        | 0.1035        |
|                                        |                                   |                        | metPC3                                   | -0.4344        | -0.1369        | 0.1713        |

<sup>(1)</sup> Presence absence of bacterial taxa in the community

<sup>(2)</sup> Abundance of bacterial taxa (conditional on presence) in the community

Log- abundance represents the log-transformed abundance of the focal OTU in the plant where the individual was residing

otuPC represents principal component of the plant bacterial taxa

metPC represents the principal component of the plant metabolites

A.

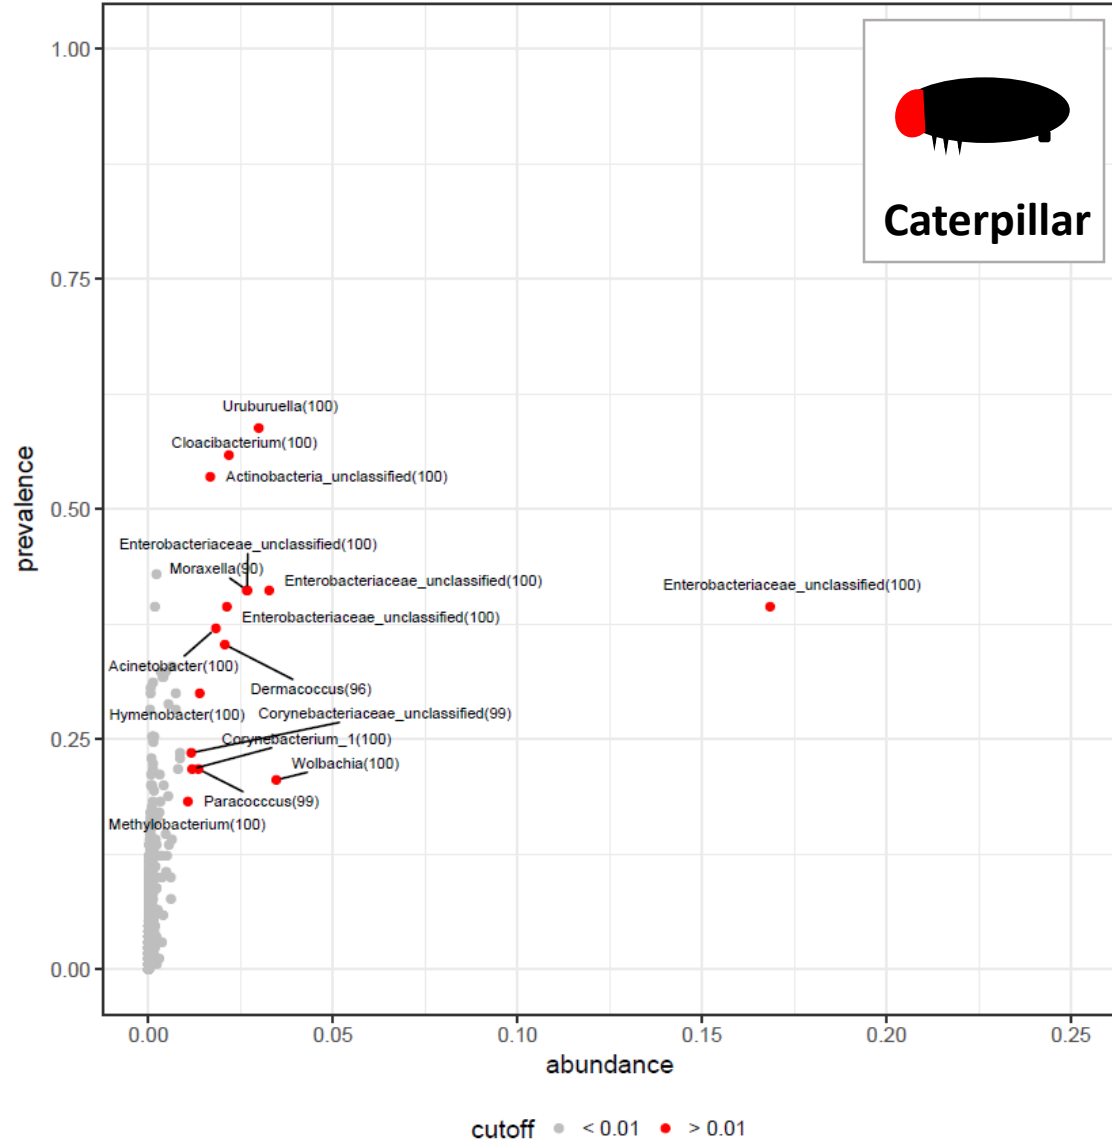

B.

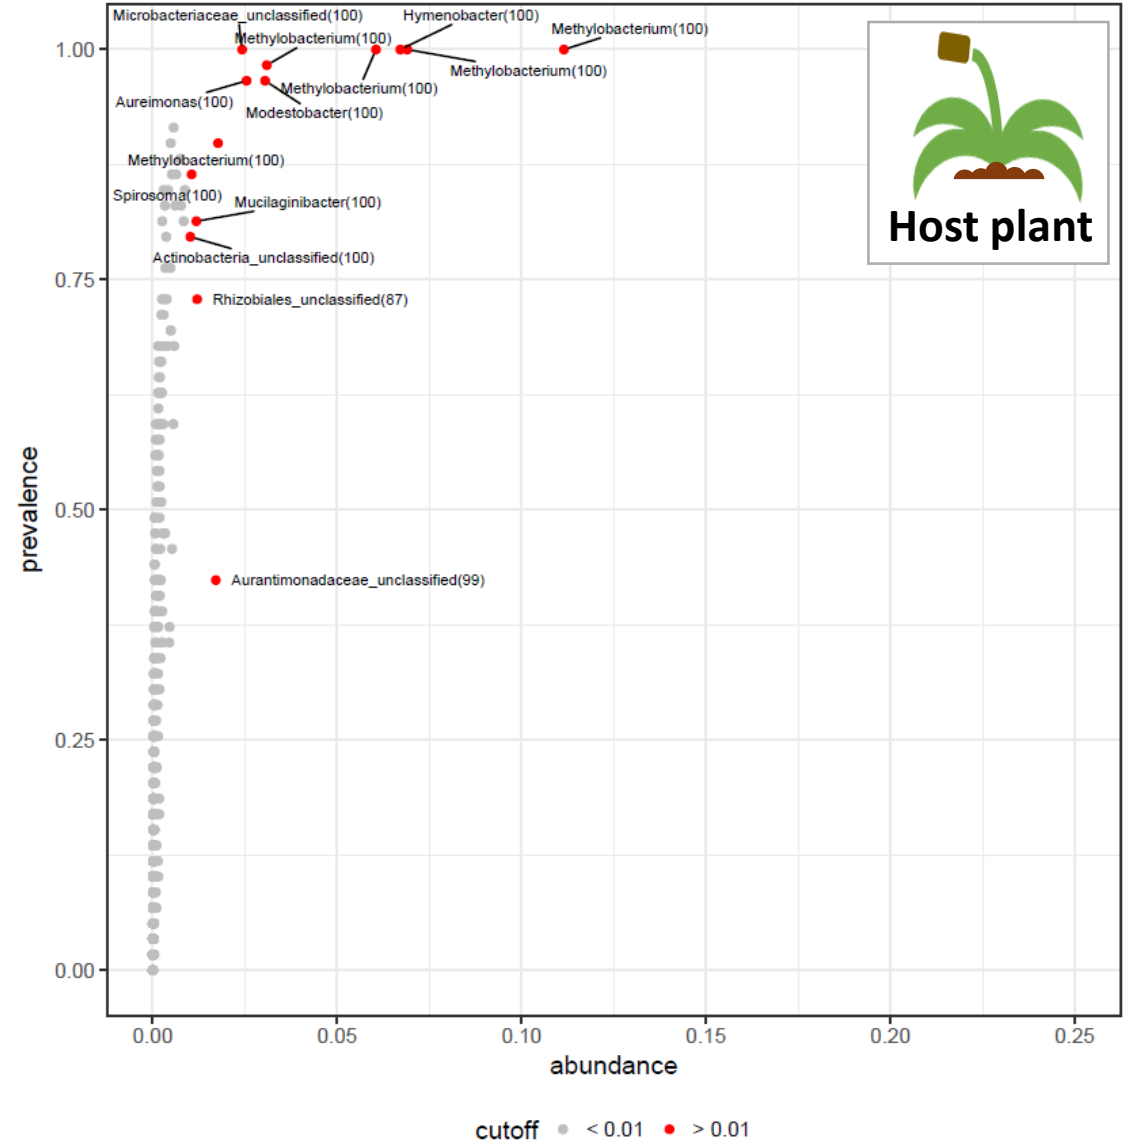

# Bacterial OTU

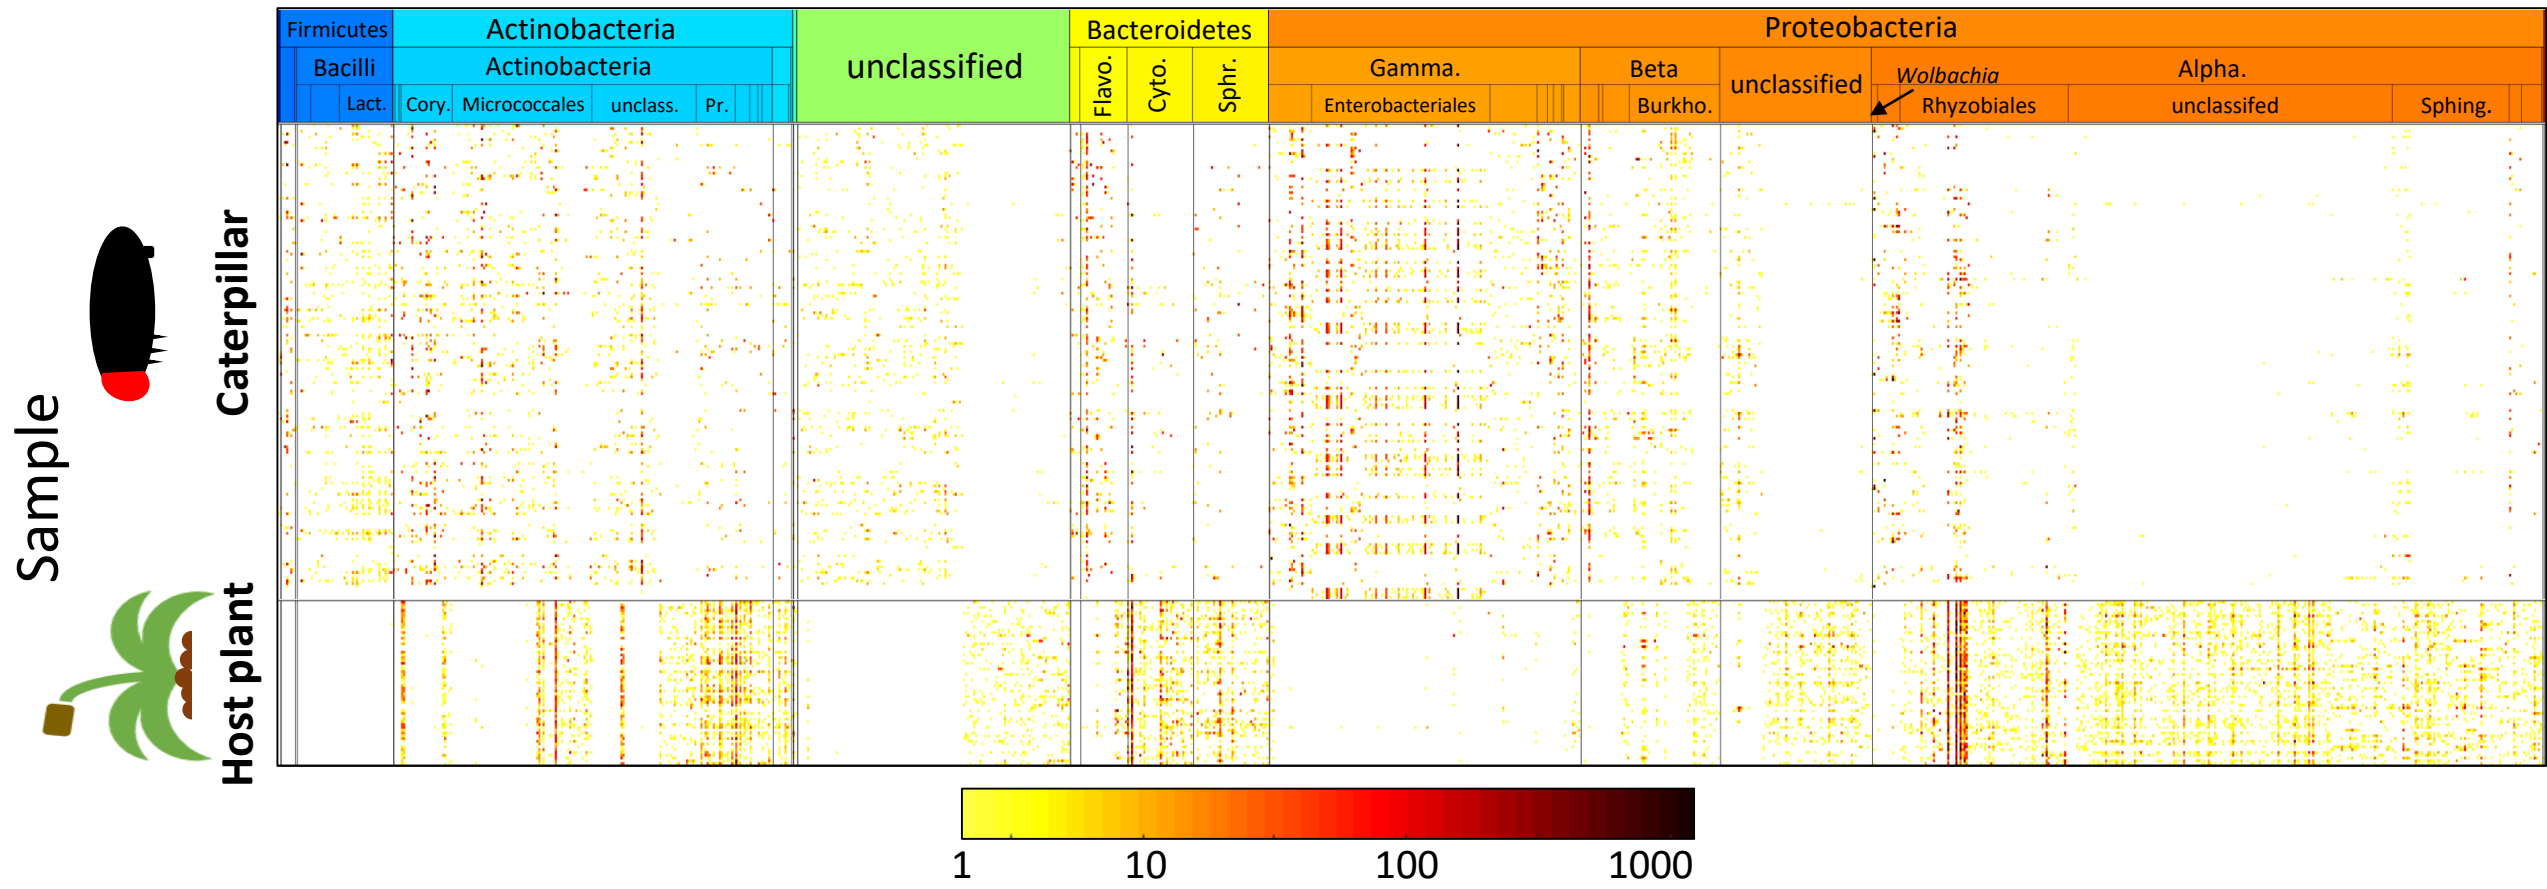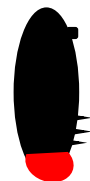

Caterpillar

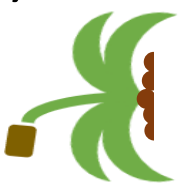

Host plant

# Bacterial OTU

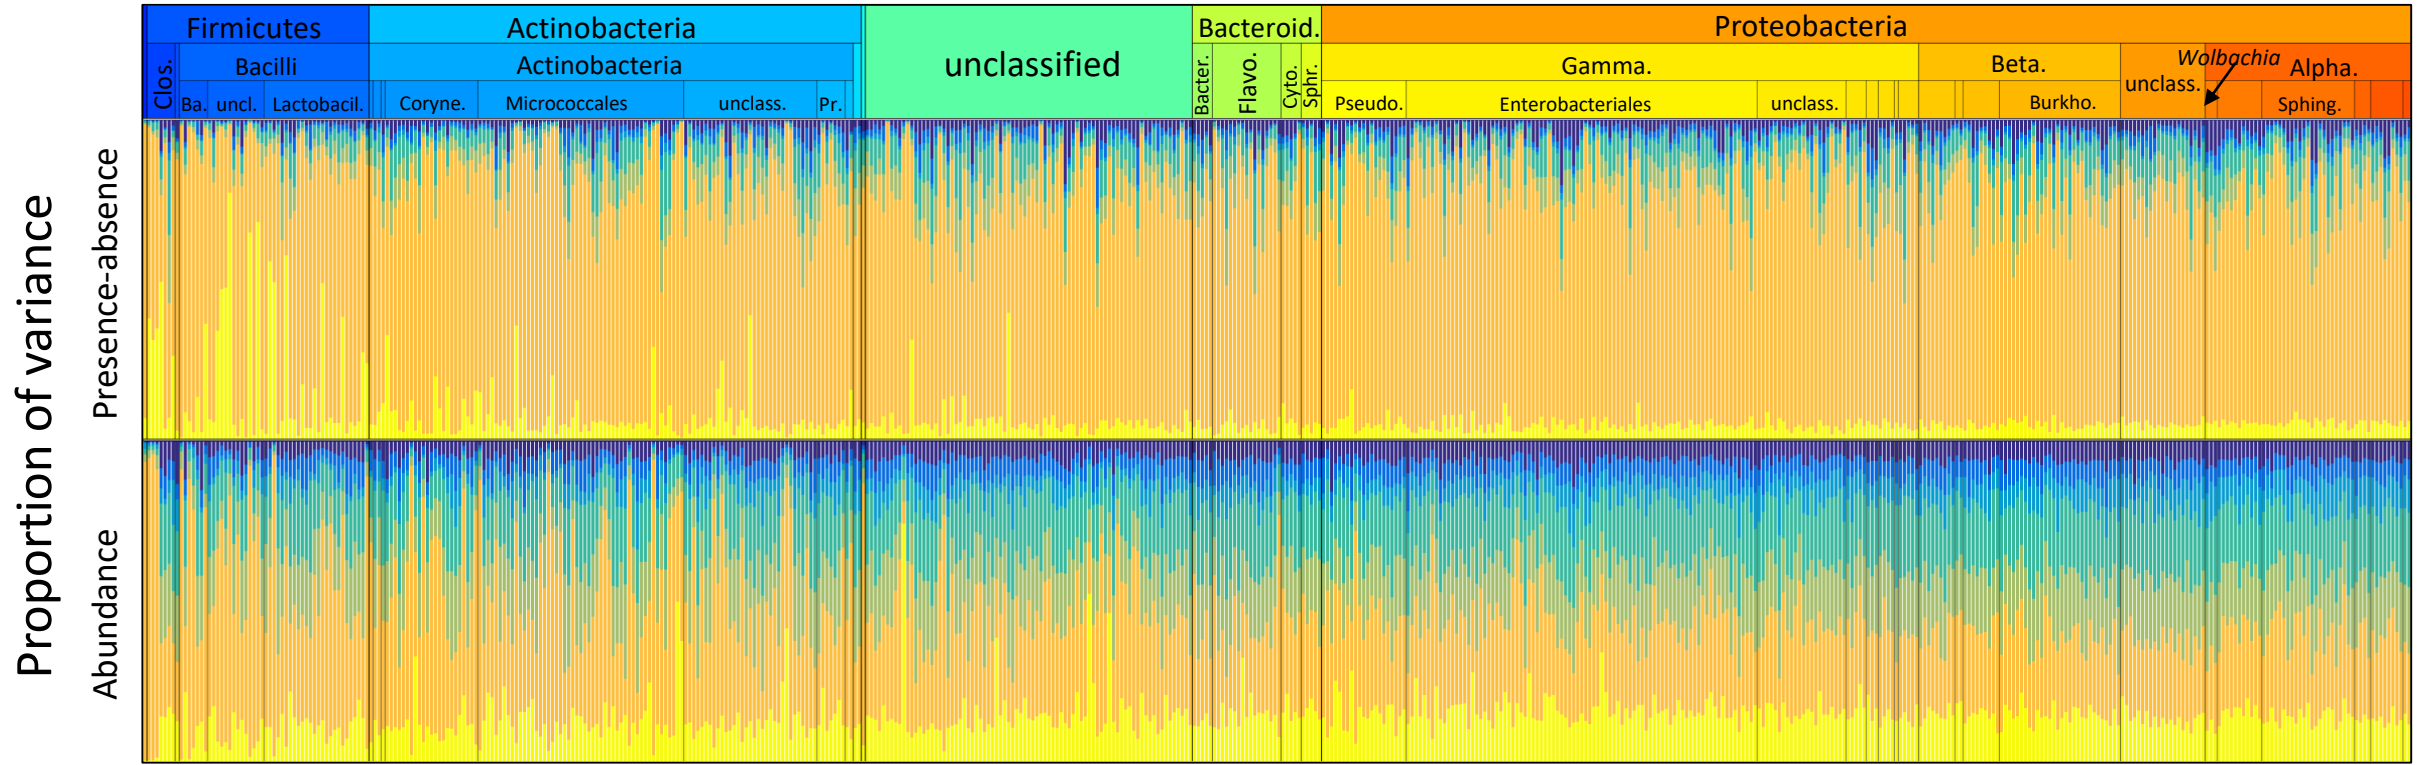

| Variable                                              | Type          | Color                                                                                 | P-A (%) | Ab (%) |
|-------------------------------------------------------|---------------|---------------------------------------------------------------------------------------|---------|--------|
| Presence of the parasitoid <i>Hyposoter horticola</i> | Fixed effect  |    | 3.5     | 5.6    |
| The sex of the caterpillar                            | Fixed effect  |   | 2.4     | 5.9    |
| Focal OTU abundance in the plant                      | Fixed effect  |  | 1.0     | 6.0    |
| Plant OTU composition (PC1,PC2,PC3)                   | Fixed effect  |  | 7.7     | 18     |
| Plant metabolic composition (PC1,PC2,PC3)             | Fixed effect  |  | 6.7     | 17     |
| Caterpillar level                                     | Random effect |  | 72      | 33     |
| Plant level                                           | Random effect |  | 6.5     | 14     |

# Bacterial OTU

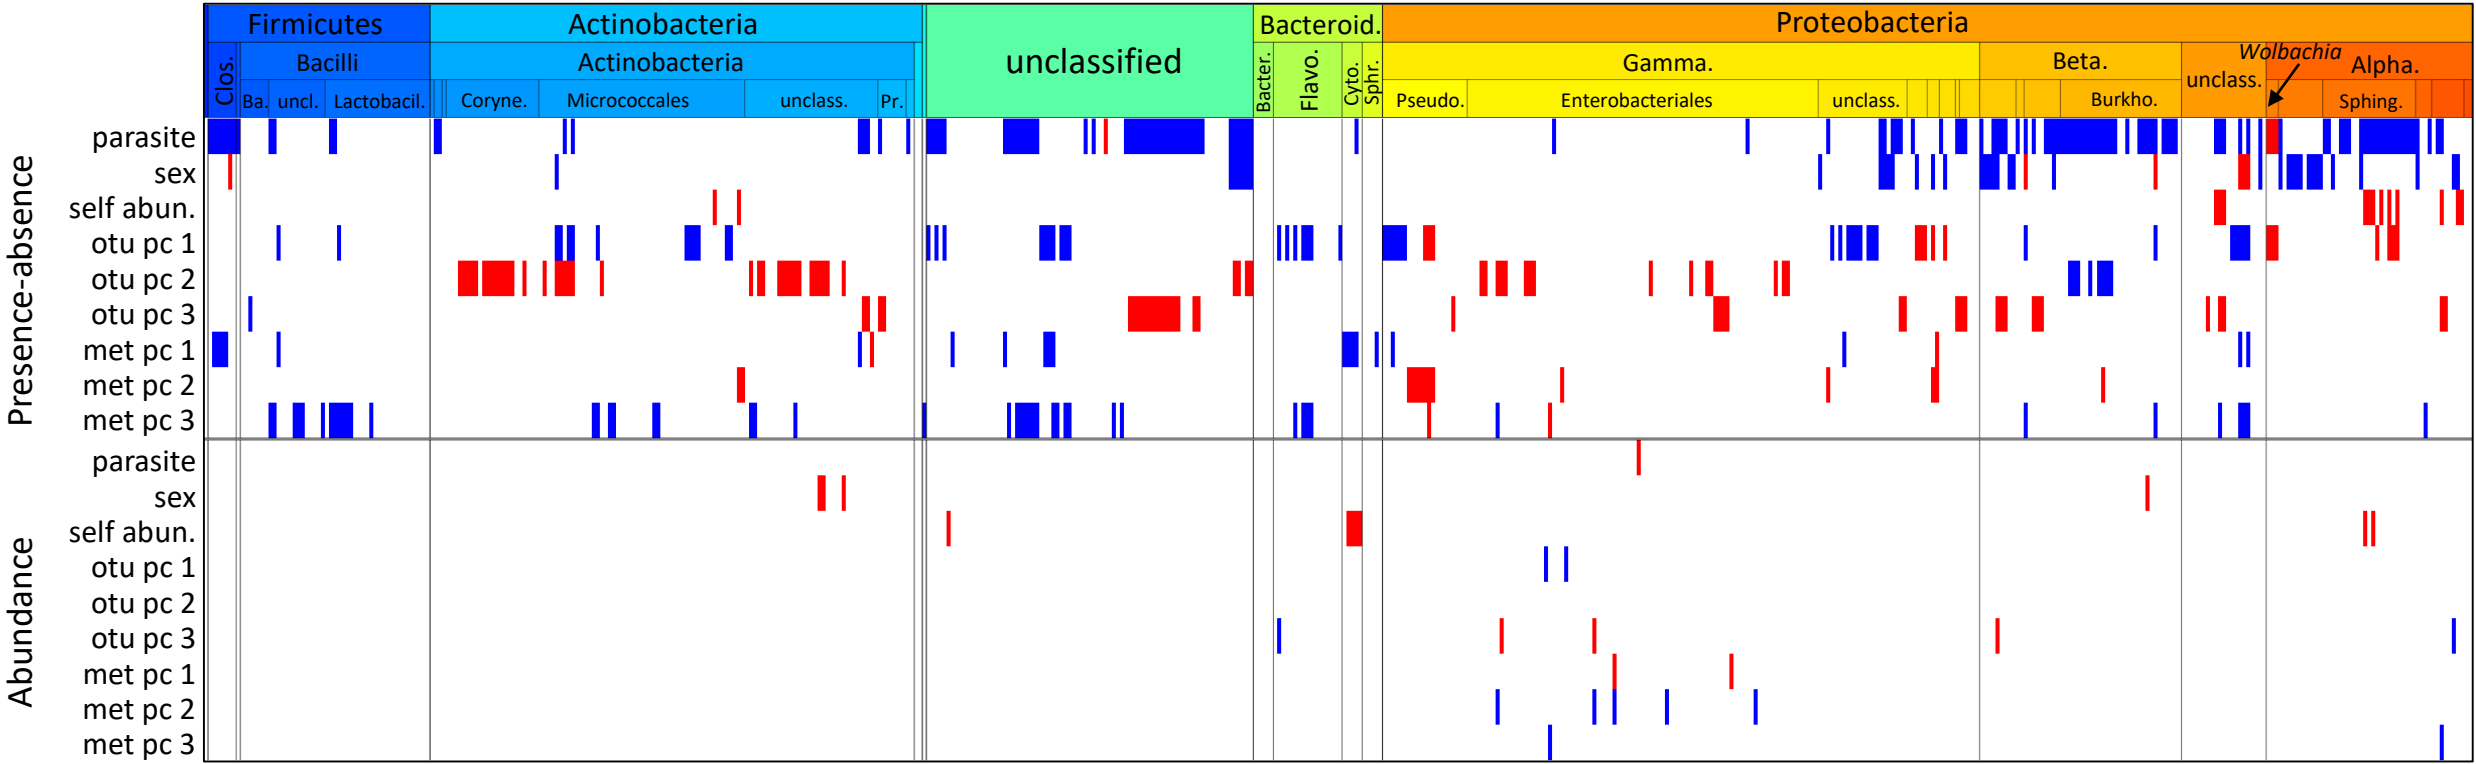

| Variable                                              | Running name |
|-------------------------------------------------------|--------------|
| Presence of the parasitoid <i>Hyposoter horticola</i> | parasite     |
| The sex of the caterpillar                            | sex          |
| Focal OTU abundance in the plant                      | self abund.  |
| Plant OTU composition (PC1,PC2,PC3)                   | otu pc 1-3   |
| Plant metabolic composition (PC1,PC2,PC3)             | met pc 1-3   |

**A.****Bacterial OTU**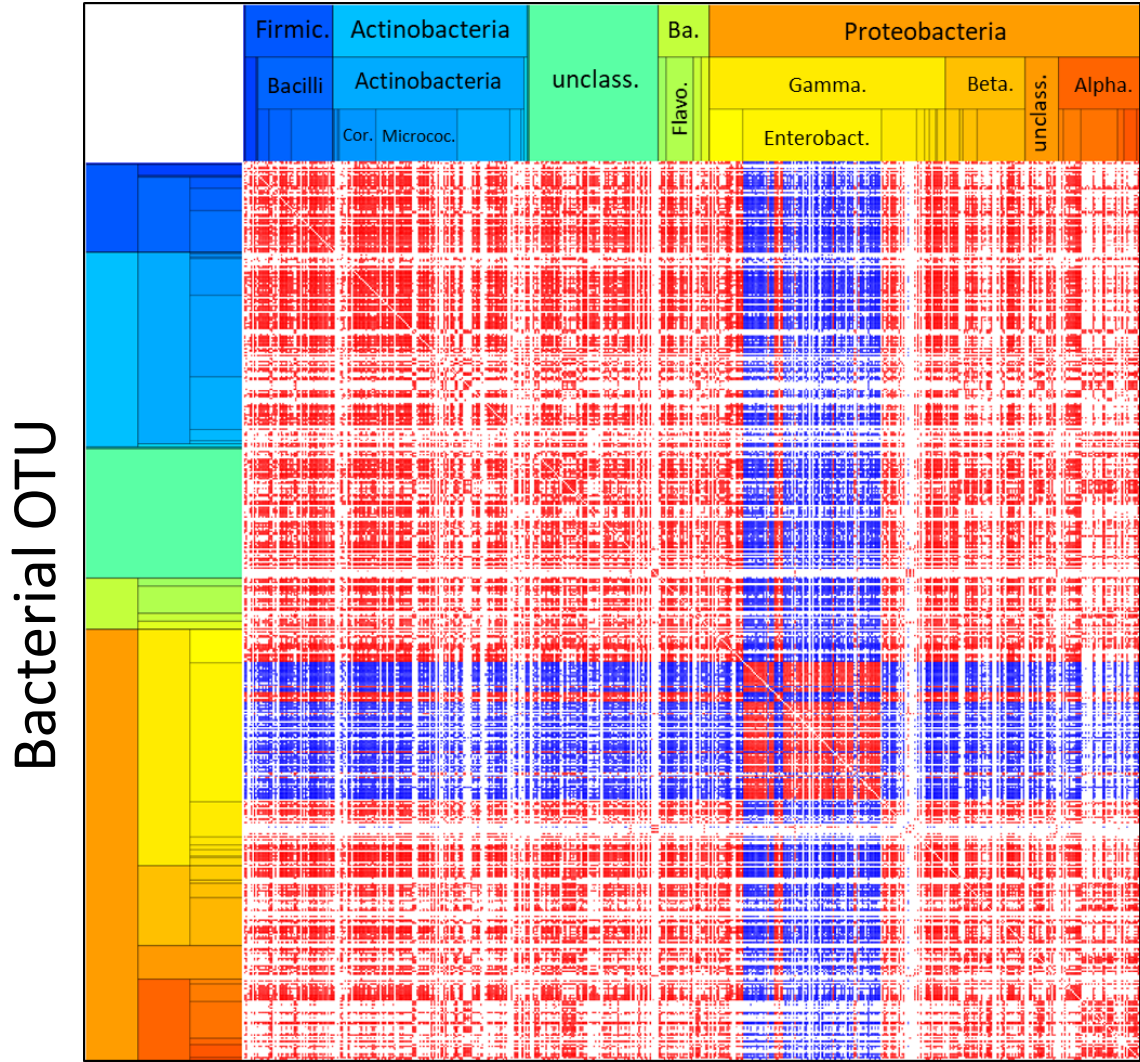

Presence-absence

**B.****Bacterial OTU**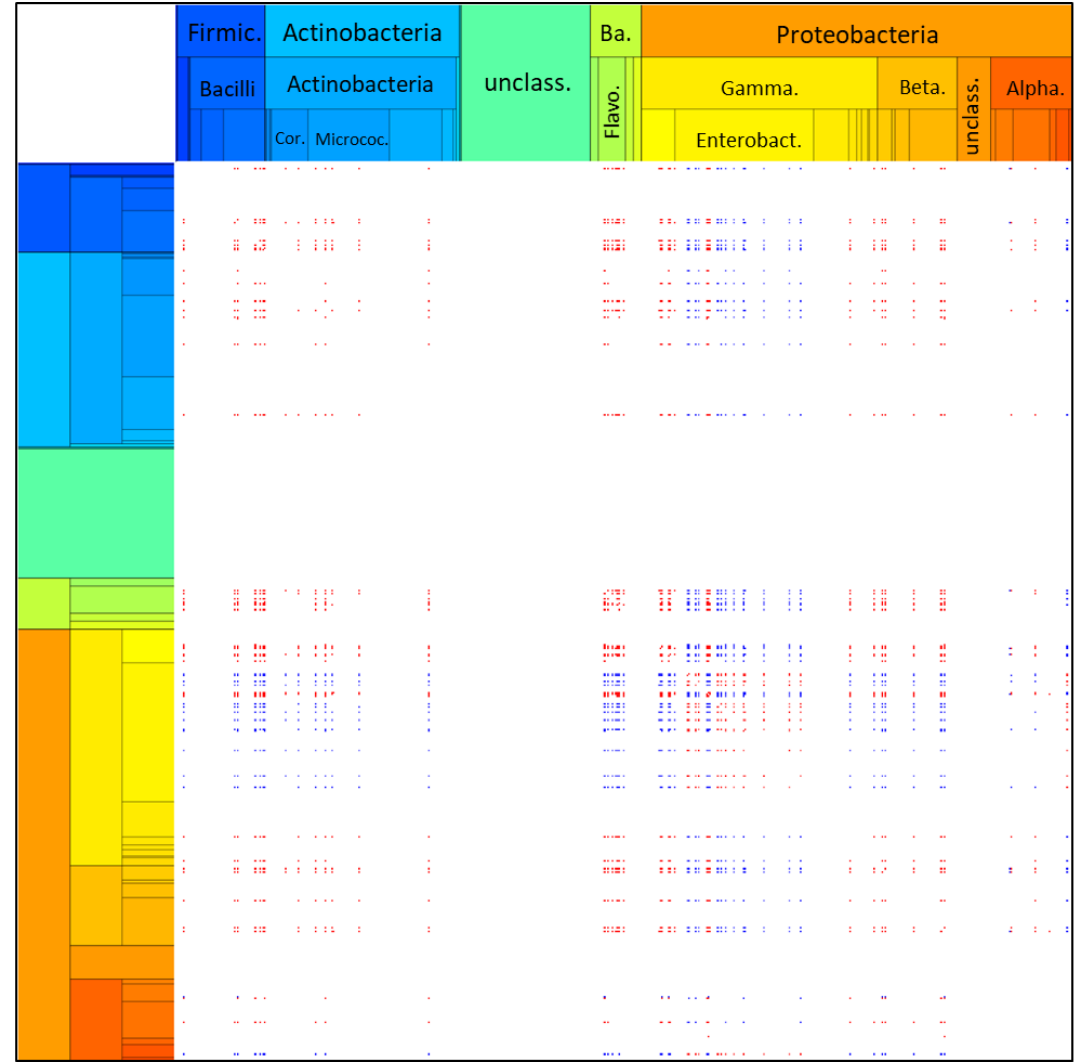

Abundance

**A.**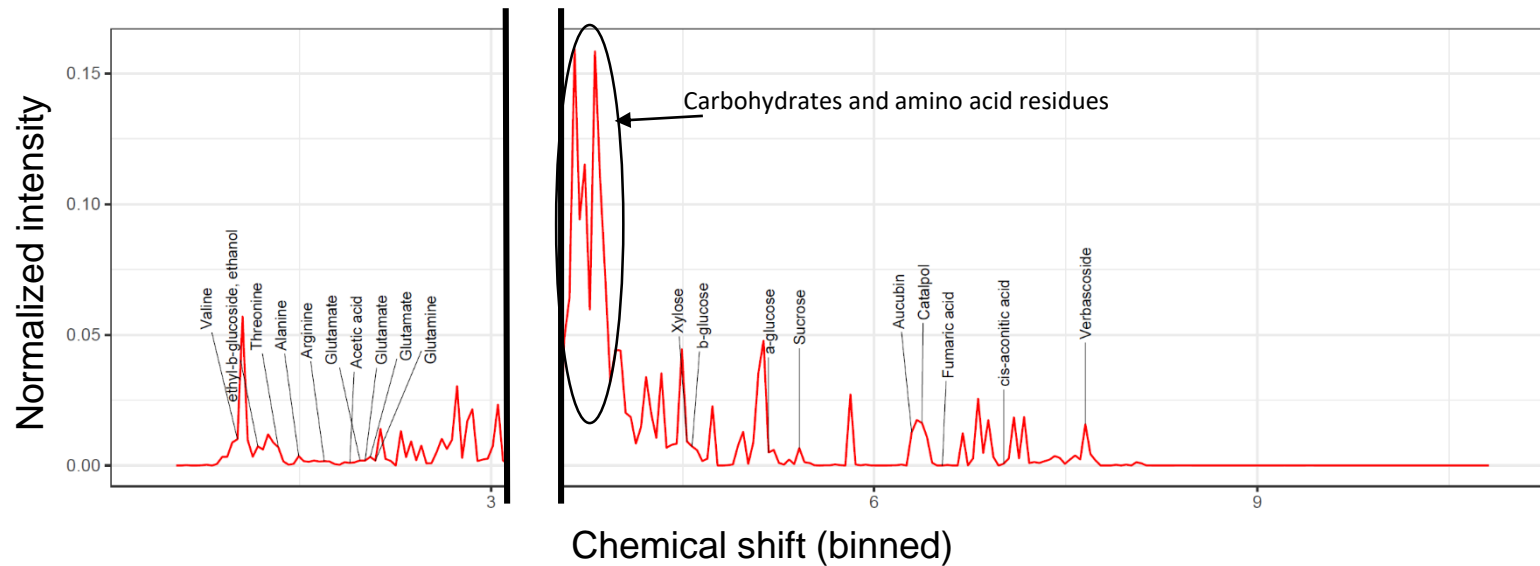**B.**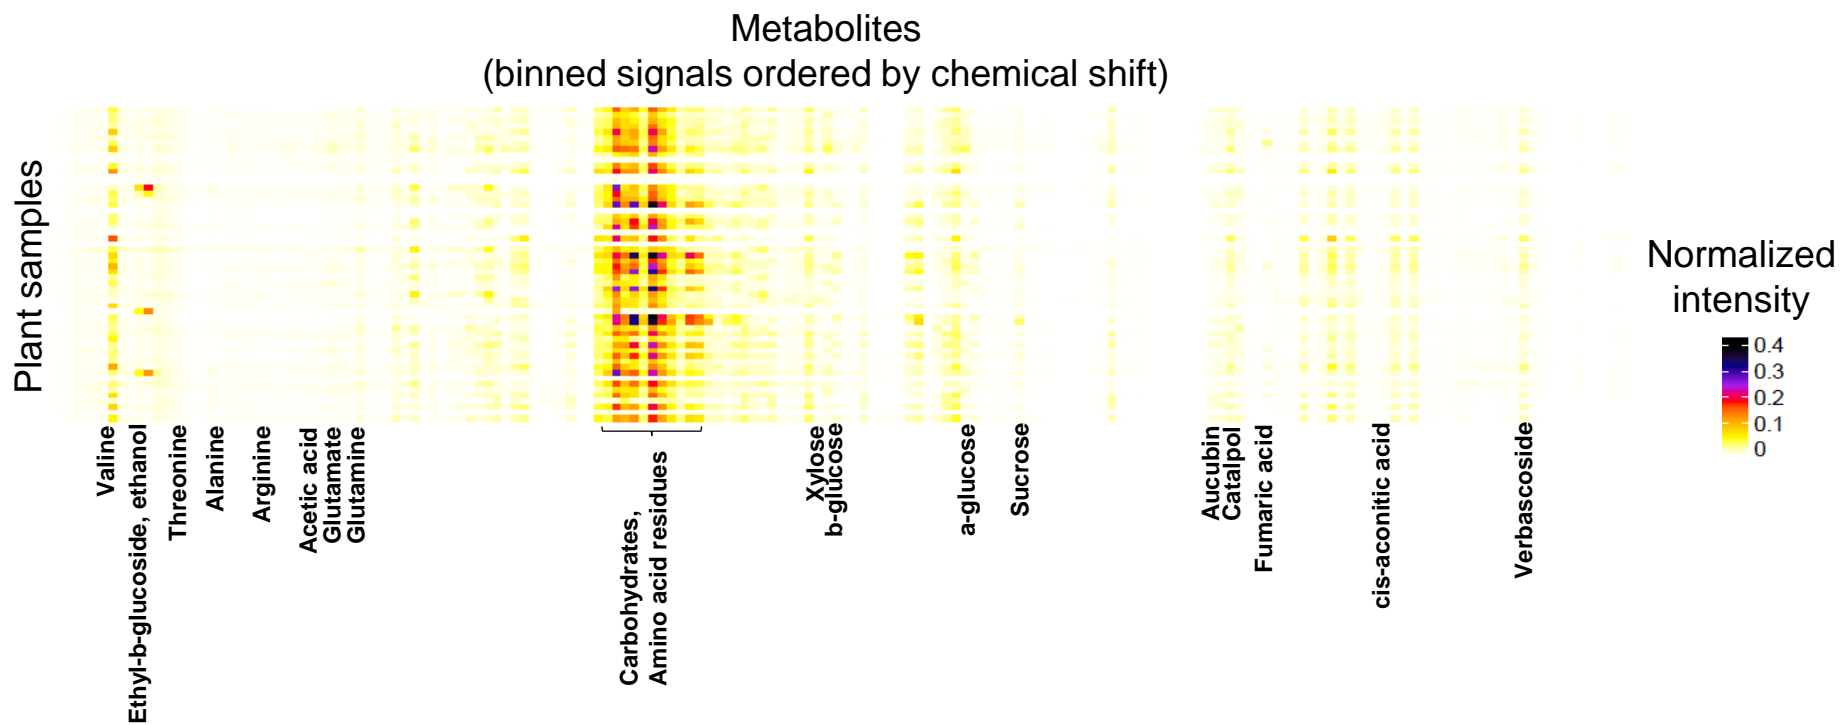

Source: http://biorxiv.org/content/10.1101/510446v1.full.pdf
